# Supplementary material for: Ba3[Al(PO4)3]: rational design of a promising deep-UV transparent SHG crystal with balanced overall performance originating from the condensation of quartz-type [Al(PO4)4]9− units
Source: Royal Society of Chemistry journal article supplement (doi:10.1039/d0tc05743f), 2020-12-24
Supplement: d0tc05743f1.pdf [file d0tc05743f1.pdf]

Supporting Information

**Ba<sub>3</sub>[Al(PO<sub>4</sub>)<sub>3</sub>]: Rational Design of a Promising Deep-UV  
Transparent SHG Crystal with Balanced Overall Performance  
Originated from the Condensation of Quartz-Type [Al(PO<sub>4</sub>)<sub>4</sub>]<sup>9-</sup>  
Units**

Zhi Fang,<sup>†</sup> Chun-Li Hu,<sup>†</sup> Bing-Ping Yang,<sup>†</sup> and Jiang-Gao Mao <sup>\*,†</sup>

<sup>†</sup>State Key Laboratory of Structural Chemistry, Fujian Institute of Research on the Structure of Matter, Chinese Academy of Sciences, Fuzhou, Fujian 350002, P. R. China

**CONTENTS**

|                                                                                                                                                                             |     |
|-----------------------------------------------------------------------------------------------------------------------------------------------------------------------------|-----|
| <b>Experimental Procedures</b>                                                                                                                                              | S2  |
| <b>Figure S1.</b> PXRD patterns for Ba <sub>3</sub> [Al(PO <sub>4</sub> ) <sub>3</sub> ].                                                                                   | S4  |
| <b>Figure S2.</b> In situ PXRD patterns at varied temperatures for Ba <sub>3</sub> [Al(PO <sub>4</sub> ) <sub>3</sub> ].                                                    | S4  |
| <b>Figure S3.</b> Recorded DSC and TG curves for Ba <sub>3</sub> [Al(PO <sub>4</sub> ) <sub>3</sub> ].                                                                      | S5  |
| <b>Figure S4.</b> Energy Dispersive Spectrum for Ba <sub>3</sub> [Al(PO <sub>4</sub> ) <sub>3</sub> ].                                                                      | S5  |
| <b>Table S1.</b> Crystal data and structure refinement for Ba <sub>3</sub> [Al(PO <sub>4</sub> ) <sub>3</sub> ].                                                            | S6  |
| <b>Table S2.</b> Fractional Atomic Coordinates and Equivalent Isotropic Displacement Parameters (Å <sup>2</sup> ) for Ba <sub>3</sub> [Al(PO <sub>4</sub> ) <sub>3</sub> ]. | S7  |
| <b>Table S3.</b> Anisotropic Displacement Parameters (Å <sup>2</sup> ) for Ba <sub>3</sub> [Al(PO <sub>4</sub> ) <sub>3</sub> ].                                            | S11 |
| <b>Table S4.</b> Bond Lengths for Ba <sub>3</sub> [Al(PO <sub>4</sub> ) <sub>3</sub> ].                                                                                     | S15 |
| <b>Table S5.</b> Crystal data and structure refinement for Ba <sub>3</sub> [Al(PO <sub>4</sub> ) <sub>3</sub> ].                                                            | S20 |
| <b>References</b>                                                                                                                                                           | S32 |

## Experimental Procedures

### Crystal Growth of BAPO

Single crystals of BAPO were obtained by a spontaneous nucleation method. Raw materials of BaCO<sub>3</sub> (99.9%, Aladdin Co.), Al<sub>2</sub>O<sub>3</sub> (99.9%, Aladdin Co.) and NH<sub>4</sub>H<sub>2</sub>PO<sub>4</sub> (99.9%, Aladdin Co.) in a molar ratio of 3:1:3 were ground and blended into a  $\phi$ 40 platinum crucible, and followed by 7 days' holding at 1323.15 K with a crystal growing furnace. After a slow cooling to 1073.15K within one month and a rapid cooling to room temperature within one day, rod-like colorless crystals of BAPO were observed at the surface.

### Single Crystal and Powder X-ray Diffraction

A colorless rod-like crystal with dimensions of 0.17×0.10×0.05mm<sup>3</sup> was selected for single-crystal X-ray diffraction. The diffraction data were collected on an Agilent Technologies Super Nova Dual Wavelength CCD diffractometer equipped with graphite-monochromatic Mo K $\alpha$  radiation ( $\lambda$ = 0.71073 Å) at 100 K and data reduction was done by using CrysAlisPro software. The crystal structure was solved by the direct methods and refined by full matrix least squares on F<sup>2</sup> by SHELXL-2017 program [1]. The structure was verified using the ADDSYM algorithm from the program PLATON [2], and no higher symmetry was found. The diffraction data of powder samples was collected by powder X-ray diffraction measurement on a Rigaku Mini Flex II X-ray diffractometer using Cu K $\alpha$  radiation ( $\lambda$ = 1.5418Å) at room temperature in the angular range of 2 $\theta$  = 10-70° with a scan step width of 0.02° and a scan rate of 2.5°/min, while in situ powder X-ray diffraction measurements in the angular range of 2 $\theta$  = 10-70° with a scan step width of 0.02° and a scan rate of 2.5°/min were performed on a Rigaku ULTIMA IV X-ray diffractometer using Cu K $\alpha$  radiation ( $\lambda$ = 1.5418Å) at variable temperatures of 450°C, 500°C, 550°C in the heating process and 300°C in the cooling process.

### UV-Vis-NIR diffuse reflectance spectrum

The reflection spectrum of BAPO crystal was performed with a PE Lambda 950 UV-vis-NIR spectrophotometer in the range of 200–1100 nm, while the reflectance of BaSO<sub>4</sub> plate was used as the referential standard (100 % reflectance).

### Thermal Analysis

Thermogravimetric analyses (TGA) and differential scanning calorimetry (DSC) measurements were performed on a NETZSCH STA 449C apparatus using Al<sub>2</sub>O<sub>3</sub> as reference material under N<sub>2</sub> flow with a sample heating rate of

20.0k/min from 50 °C to 1100 °C. After the measurement, the sample was checked by powder XRD.

### **Powder Second Harmonic Generation Measurement**

SHG Measurements for BAPO were carried out with a Nd:YAG 1064 nm laser. Sieved KDP sample with particle size of 212-270  $\mu\text{m}$  was taken as reference for assuming SHG signals. The samples were ground and sieved into six discrete ranges of particle sizes, namely 45-53, 53-75, 75-109, 109-150, 150-212 and 212-270  $\mu\text{m}$ .

### **Computational Methods**

The calculations of electronic and optical properties were performed with the CASTEP code using the plane-wave pseudopotential density functional theory (DFT) [3]. The generalized gradient approximation (GGA) Perdew-Burke-Ernzerhof (PBE) was chosen as the exchange-correlation functional [4]. The core-electron interactions were represented by the norm-conserving pseudopotential [5]. Al  $3s^2 3p^1$ , O- $2s^2 2p^4$ , P- $3s^2 3p^3$  and Ba- $5s^2 5p^6 6s^2$  orbital electrons were set as the valence electrons. A cutoff energy of 750 eV was utilized for determination of the number of plane-wave basis sets. Monkhorst-Pack k-point sampling was  $2 \times 2 \times 2$  for numerical integration over Brillouin zone. More than 960 empty bands were used during the optical property calculations.

The second-order NLO properties of the material were calculated implementing the length-gauge formalism in the independent-particle approximation. According to the latest research [6], the static SHG susceptibility can be written as  $\chi^{\alpha\beta\gamma} = \chi^{\alpha\beta\gamma}(\text{VE}) + \chi^{\alpha\beta\gamma}(\text{VH})$ , where  $\chi^{\alpha\beta\gamma}(\text{VE})$  is contributed by virtual-electron processes and  $\chi^{\alpha\beta\gamma}(\text{VH})$  is contributed by virtual-hole processes. The formulas of  $\chi^{\alpha\beta\gamma}(\text{VE})$  and  $\chi^{\alpha\beta\gamma}(\text{VH})$  are given in Chen's paper [7].

### **Energy Dispersive Spectrum**

Microprobe elemental analyses for the Ba, Al, Fe and P elements were performed on a field-emission scanning electron microscope (FESEM, JSM6700F) equipped with an energy-dispersive X-ray spectroscope (EDS, Oxford INCA).

Figure S1. PXRD patterns for  $\text{Ba}_3[\text{Al}(\text{PO}_4)_3]$ .

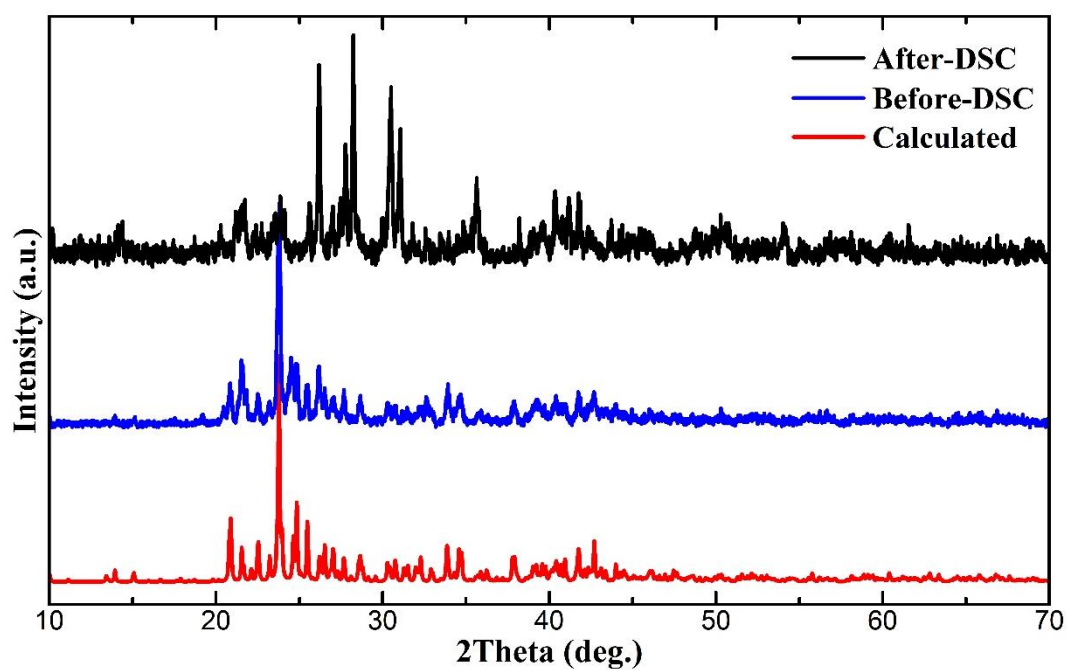

Figure S2. In situ PXRD patterns at varied temperatures for  $\text{Ba}_3[\text{Al}(\text{PO}_4)_3]$ .

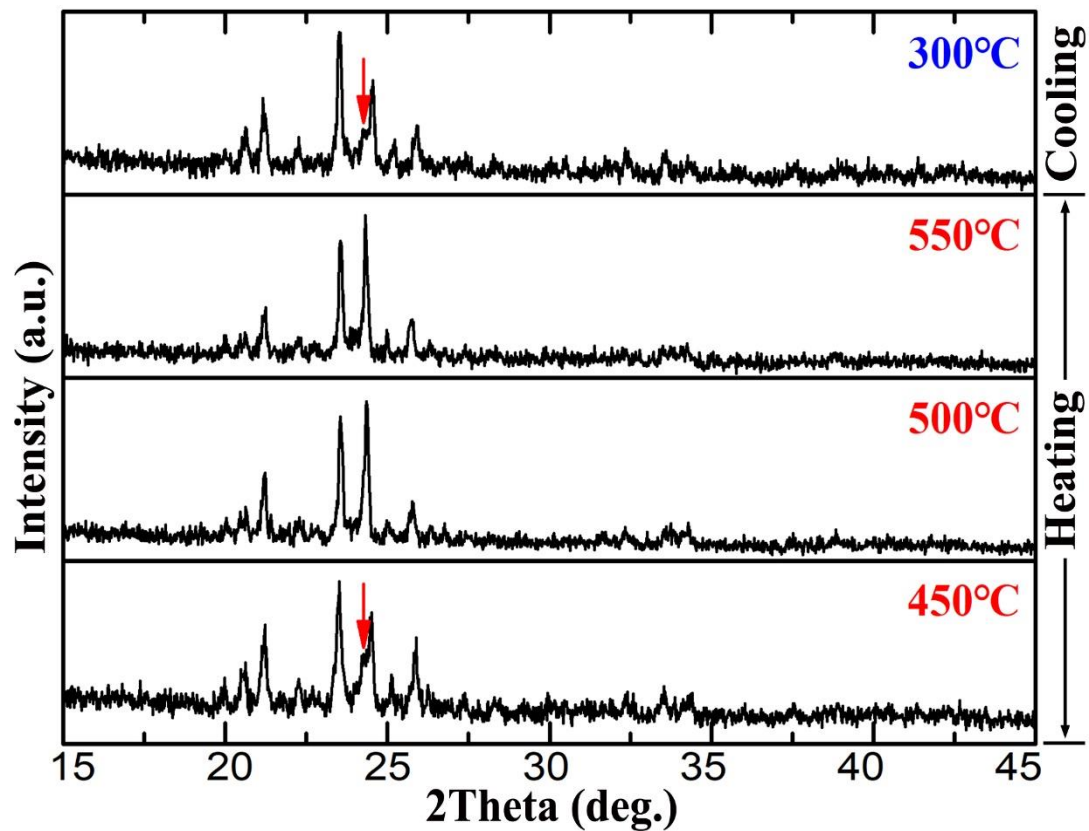

**Figure S3.** Recorded DSC and TG curves for Ba<sub>3</sub>[Al(PO<sub>4</sub>)<sub>3</sub>].

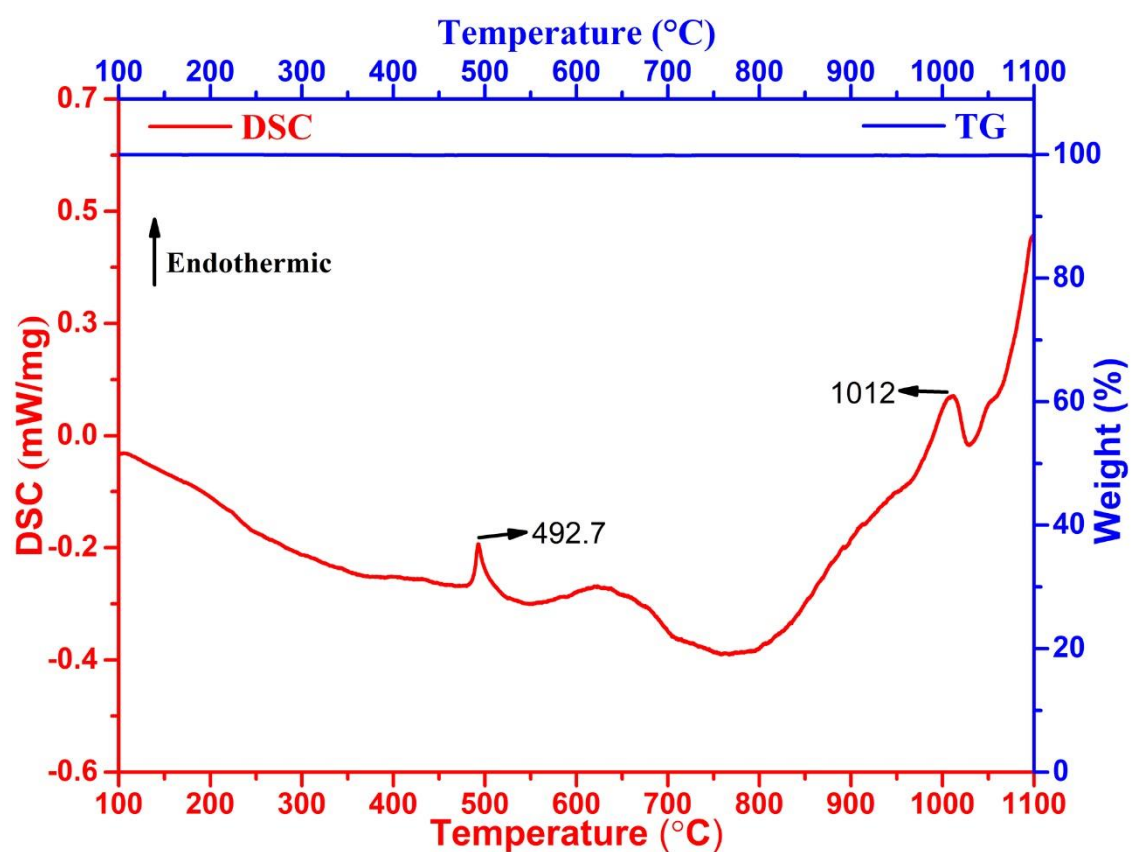

**Figure S4.** Energy Dispersive Spectrum for Ba<sub>3</sub>[Al(PO<sub>4</sub>)<sub>3</sub>].

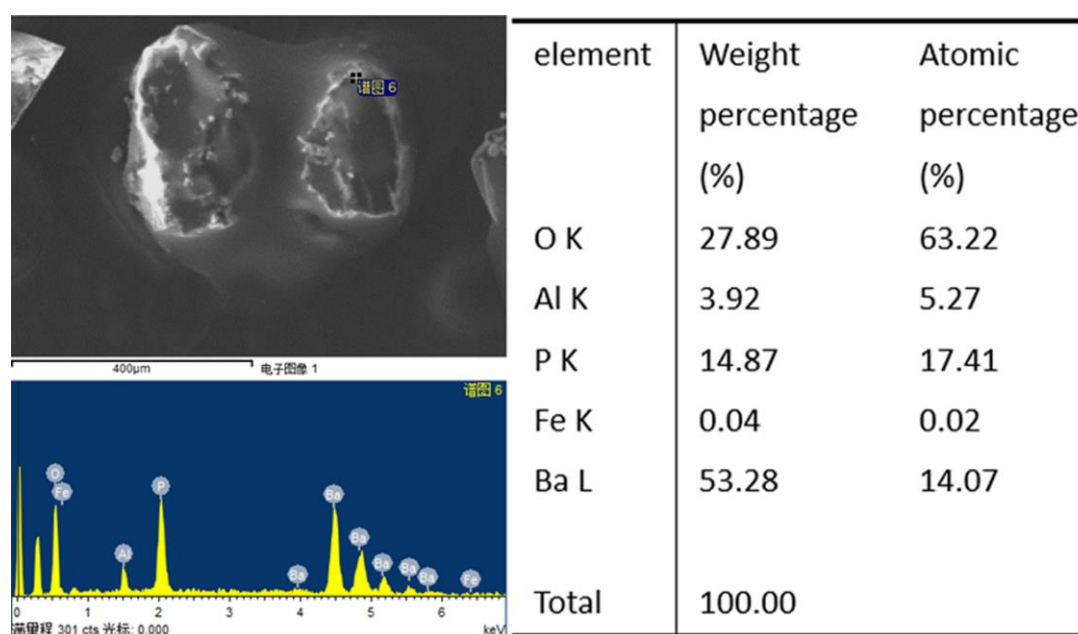

**Table S1.** Crystal data and structure refinement for Ba<sub>3</sub>[Al(PO<sub>4</sub>)<sub>3</sub>].

|                                                       |                                                                               |
|-------------------------------------------------------|-------------------------------------------------------------------------------|
| Empirical formula                                     | Ba <sub>3</sub> AlP <sub>3</sub> O <sub>12</sub>                              |
| Formula weight                                        | 723.91                                                                        |
| Temperature/K                                         | 100.0(2)                                                                      |
| Crystal system                                        | triclinic                                                                     |
| Space group                                           | <i>P</i> 1                                                                    |
| <i>a</i> /Å                                           | 12.7192(3)                                                                    |
| <i>b</i> /Å                                           | 12.7916(3)                                                                    |
| <i>c</i> /Å                                           | 15.8220(4)                                                                    |
| $\alpha$ /°                                           | 90.058(2)                                                                     |
| $\beta$ /°                                            | 90.033(2)                                                                     |
| $\gamma$ /°                                           | 111.917(2)                                                                    |
| Volume/Å <sup>3</sup>                                 | 2388.17(10)                                                                   |
| Z                                                     | 8                                                                             |
| $\rho_{\text{calc}}/\text{cm}^3$                      | 4.027                                                                         |
| $\mu/\text{mm}^{-1}$                                  | 10.317                                                                        |
| F(000)                                                | 2576.0                                                                        |
| Crystal size/mm <sup>3</sup>                          | 0.169 × 0.098 × 0.045                                                         |
| Radiation                                             | MoK $\alpha$ ( $\lambda$ = 0.71073)                                           |
| 2 $\theta$ range for data collection/°                | 3.854 to 74.312                                                               |
| Index ranges                                          | -21 ≤ <i>h</i> ≤ 21, -21 ≤ <i>k</i> ≤ 21, -26 ≤ <i>l</i> ≤ 26                 |
| Reflections collected                                 | 78838                                                                         |
| Independent reflections                               | 45647 [ <i>R</i> <sub>int</sub> = 0.0390, <i>R</i> <sub>sigma</sub> = 0.0682] |
| Data/restraints/parameters                            | 45647/921/1370                                                                |
| Goodness-of-fit on F <sup>2</sup>                     | 1.095                                                                         |
| Final R indexes [ <i>I</i> > 2 $\sigma$ ( <i>I</i> )] | <i>R</i> <sub>1</sub> = 0.0451, <i>wR</i> <sub>2</sub> = 0.0852               |
| Final R indexes [all data]                            | <i>R</i> <sub>1</sub> = 0.0496, <i>wR</i> <sub>2</sub> = 0.0874               |
| Largest diff. peak/hole/eÅ <sup>-3</sup>              | 2.47/-2.66                                                                    |
| Flack parameter                                       | 0.333(12)                                                                     |

**Table S2.** Fractional Atomic Coordinates and Equivalent Isotropic Displacement Parameters ( $\text{\AA}^2$ ) for  $\text{Ba}_3[\text{Al}(\text{PO}_4)_3]$ .

| Atom | x            | y            | z             | U(eq)        |
|------|--------------|--------------|---------------|--------------|
| Ba01 | -0.51233 (5) | 0.11937 (5)  | 0.22968 (4)   | 0.00546 (9)  |
| Ba02 | 1.09002 (5)  | 1.30078 (5)  | 0.60219 (4)   | 0.00640 (9)  |
| Ba03 | 0.16600 (5)  | 0.34710 (5)  | 0.18047 (4)   | 0.00568 (9)  |
| Ba04 | -0.15498 (5) | 0.22846 (5)  | 0.38593 (4)   | 0.00637 (9)  |
| Ba05 | 1.15953 (5)  | 1.25100 (5)  | 0.89616 (4)   | 0.00674 (10) |
| Ba06 | 0.02788 (5)  | -0.03437 (5) | 0.44091 (4)   | 0.00594 (9)  |
| Ba07 | 0.31361 (5)  | -0.34116 (5) | 0.67515 (4)   | 0.00533 (9)  |
| Ba08 | 0.98208 (5)  | -0.10854 (5) | 0.72554 (4)   | 0.00638 (10) |
| Ba11 | 1.46722 (5)  | 1.39360 (5)  | 0.73426 (4)   | 0.00651 (10) |
| Ba12 | -0.32106 (5) | -0.12406 (5) | 0.28675 (4)   | 0.00544 (9)  |
| Ba13 | 0.59763 (5)  | 0.42511 (5)  | 0.42566 (4)   | 0.00534 (9)  |
| Ba14 | 0.87431 (5)  | 0.58059 (5)  | -0.07555 (4)  | 0.00559 (9)  |
| Ba15 | 0.79068 (5)  | 0.14441 (5)  | 0.79192 (4)   | 0.00527 (9)  |
| Ba16 | 0.09114 (5)  | -0.10676 (5) | 0.00666 (4)   | 0.00662 (10) |
| Ba17 | 1.45280 (5)  | 1.05758 (5)  | 0.93946 (4)   | 0.00559 (9)  |
| Ba18 | 0.66900 (5)  | 0.75723 (5)  | 0.55474 (4)   | 0.00685 (10) |
| Ba19 | 0.94760 (5)  | 0.60415 (5)  | 0.53533 (4)   | 0.00616 (9)  |
| Ba20 | 1.51243 (5)  | 0.41130 (5)  | 1.04001 (4)   | 0.00742 (10) |
| Ba21 | 0.37211 (5)  | -0.28288 (5) | 0.09503 (4)   | 0.00706 (10) |
| Ba22 | 0.37180 (5)  | 0.10725 (5)  | 0.50256 (4)   | 0.00618 (9)  |
| Ba23 | 0.30297 (5)  | -0.25250 (5) | 0.39458 (4)   | 0.00752 (10) |
| Ba24 | 0.60990 (5)  | 0.77634 (5)  | 0.87323 (4)   | 0.00745 (10) |
| Ba25 | 0.81637 (6)  | 0.25546 (5)  | 0.06630 (4)   | 0.00990 (11) |
| Ba26 | -0.00363 (5) | -0.39364 (6) | 0.23638 (4)   | 0.00929 (11) |
| P01  | -0.0811 (2)  | 0.0198 (2)   | -0.08902 (17) | 0.0053 (4)   |
| P02  | -0.4054 (2)  | -0.0182 (2)  | 0.08742 (17)  | 0.0050 (4)   |
| P03  | 0.0794 (2)   | 0.4679 (2)   | 0.40615 (18)  | 0.0065 (4)   |
| P04  | 0.8743 (2)   | 0.0374 (2)   | 0.58305 (17)  | 0.0052 (4)   |
| P05  | 0.7228 (2)   | 0.3578 (2)   | 0.24321 (18)  | 0.0075 (5)   |
| P06  | 0.2808 (2)   | 0.1643 (2)   | 0.05055 (17)  | 0.0048 (4)   |
| P07  | -0.0533 (2)  | 0.0560 (2)   | 0.22969 (18)  | 0.0071 (5)   |
| P08  | 0.7396 (2)   | 0.6842 (2)   | 0.05415 (18)  | 0.0076 (5)   |
| P09  | 0.8192 (2)   | 0.7245 (2)   | 0.38207 (18)  | 0.0070 (4)   |
| P10  | 0.2946 (2)   | 0.2249 (2)   | 0.34194 (17)  | 0.0063 (4)   |
| P11  | 0.6698 (2)   | 0.3105 (2)   | 0.90351 (18)  | 0.0073 (5)   |
| P12  | 1.1881 (2)   | 0.8412 (2)   | 0.55174 (17)  | 0.0045 (4)   |

|     |             |             |              |             |
|-----|-------------|-------------|--------------|-------------|
| P13 | 0.5201 (2)  | -0.0368 (2) | 0.74096 (17) | 0.0058 (4)  |
| P14 | 0.6883 (2)  | 0.3033 (2)  | 0.57120 (18) | 0.0071 (4)  |
| P15 | 1.2412 (2)  | 1.1587 (2)  | 0.67904 (17) | 0.0062 (4)  |
| P16 | 0.5411 (2)  | -0.0249 (2) | 0.41470 (18) | 0.0059 (4)  |
| P17 | 0.7529 (2)  | 0.6593 (2)  | 0.72813 (18) | 0.0064 (4)  |
| P18 | 1.3747 (2)  | 0.5270 (2)  | 0.88519 (18) | 0.0071 (4)  |
| P19 | 0.4281 (2)  | 0.5174 (2)  | 0.55569 (17) | 0.0069 (4)  |
| P20 | 0.4561 (2)  | 0.5708 (2)  | 0.24192 (18) | 0.0075 (4)  |
| P21 | 1.1879 (2)  | 0.7898 (2)  | 0.84721 (17) | 0.0064 (4)  |
| P22 | 1.0031 (2)  | 0.4538 (2)  | 0.73871 (18) | 0.0065 (4)  |
| A01 | 0.7637 (3)  | 0.4304 (3)  | 0.7331 (2)   | 0.0058 (5)  |
| A02 | 1.1561 (3)  | 0.5603 (3)  | 0.8853 (2)   | 0.0060 (5)  |
| A03 | 1.2841 (3)  | 0.9620 (3)  | 0.7147 (2)   | 0.0060 (5)  |
| P23 | 0.2168 (2)  | -0.1508 (2) | 0.18452 (17) | 0.0069 (4)  |
| A04 | 0.6512 (3)  | 0.0667 (3)  | 0.5794 (2)   | 0.0052 (5)  |
| P24 | 1.0648 (2)  | 0.4968 (2)  | 1.05951 (18) | 0.0076 (5)  |
| A05 | 0.3091 (3)  | 0.4569 (3)  | 0.3922 (2)   | 0.0058 (5)  |
| A06 | 0.1822 (3)  | 0.0518 (3)  | 0.2144 (2)   | 0.0064 (5)  |
| A07 | 0.6891 (3)  | 0.5803 (3)  | 0.2354 (2)   | 0.0061 (5)  |
| A08 | -0.1911 (3) | -0.0697 (3) | 0.0802 (2)   | 0.0050 (5)  |
| O01 | 0.3985 (6)  | 0.1788 (7)  | 0.0826 (5)   | 0.0077 (12) |
| O02 | 0.2155 (6)  | 0.1386 (7)  | 0.3998 (5)   | 0.0097 (13) |
| O03 | 1.0697 (6)  | 0.8286 (7)  | 0.5838 (5)   | 0.0074 (12) |
| O04 | 0.0724 (7)  | 0.5832 (7)  | 0.3914 (5)   | 0.0103 (13) |
| O05 | 0.5425 (7)  | 0.5151 (7)  | 0.5808 (5)   | 0.0094 (13) |
| O06 | 0.8032 (6)  | 0.8317 (7)  | 0.4099 (5)   | 0.0085 (13) |
| O07 | -0.4174 (6) | 0.0959 (6)  | 0.0808 (5)   | 0.0064 (12) |
| O08 | -0.0696 (7) | 0.1423 (6)  | -0.0801 (5)  | 0.0079 (13) |
| O09 | 0.7073 (7)  | 0.3873 (7)  | 0.9813 (5)   | 0.0104 (14) |
| O10 | 0.3358 (7)  | 0.4612 (7)  | 0.6208 (5)   | 0.0103 (14) |
| O11 | 1.2058 (6)  | 1.0464 (6)  | 0.7328 (5)   | 0.0080 (12) |
| O12 | 0.6862 (7)  | 0.2002 (7)  | 0.9190 (5)   | 0.0099 (13) |
| O13 | 0.6858 (7)  | 0.3204 (7)  | 0.6691 (5)   | 0.0121 (14) |
| O14 | -0.0002 (7) | 0.4048 (7)  | 0.4786 (5)   | 0.0123 (14) |
| O15 | 1.2089 (6)  | 0.8937 (6)  | 0.4637 (5)   | 0.0076 (12) |
| O16 | 0.1846 (6)  | 0.0765 (6)  | 0.1063 (5)   | 0.0074 (12) |
| O17 | 0.3991 (7)  | 0.4484 (8)  | 0.4703 (6)   | 0.0135 (15) |
| O18 | 0.9424 (7)  | 0.7364 (7)  | 0.3794 (5)   | 0.0107 (13) |
| O19 | 1.2052 (6)  | 0.7289 (6)  | 0.5525 (5)   | 0.0076 (12) |
| O20 | 0.6019 (6)  | 0.0574 (6)  | 0.6827 (5)   | 0.0070 (12) |



|     |             |             |             |             |
|-----|-------------|-------------|-------------|-------------|
| O21 | -0.1288 (7) | -0.0519 (6) | 0.1799 (5)  | 0.0089 (13) |
| O22 | 0.9074 (7)  | 0.0953 (6)  | 0.6684 (5)  | 0.0089 (13) |
| O23 | 0.2528 (7)  | -0.0372 (7) | 0.2383 (5)  | 0.0113 (14) |
| O24 | 0.2417 (7)  | -0.2391 (7) | 0.2365 (5)  | 0.0104 (13) |
| O25 | 0.4363 (6)  | -0.0150 (7) | 0.3745 (5)  | 0.0083 (13) |
| O26 | 0.9476 (7)  | 0.5017 (7)  | 1.0704 (5)  | 0.0112 (14) |
| O27 | -0.2737 (7) | 0.0122 (7)  | 0.0792 (5)  | 0.0094 (13) |
| O28 | 0.8986 (6)  | -0.0714 (6) | 0.5802 (5)  | 0.0070 (12) |
| O29 | 1.4275 (7)  | 0.5868 (7)  | 0.8026 (5)  | 0.0091 (13) |
| O30 | -0.1843 (7) | -0.0464 (7) | -0.1415 (5) | 0.0090 (13) |
| O31 | 0.6698 (7)  | 0.2932 (7)  | 0.3232 (5)  | 0.0093 (13) |
| O32 | 0.9071 (7)  | 0.4954 (7)  | 0.7091 (5)  | 0.0102 (13) |
| O33 | -0.1185 (7) | 0.0604 (7)  | 0.3089 (5)  | 0.0126 (15) |
| O34 | -0.4661 (6) | -0.0991 (7) | 0.0153 (5)  | 0.0086 (13) |
| O35 | 0.2635 (7)  | 0.3323 (7)  | 0.3375 (5)  | 0.0091 (13) |
| O36 | 0.0566 (7)  | 0.3977 (8)  | 0.3257 (6)  | 0.0139 (15) |
| O37 | 0.6974 (7)  | 0.5260 (7)  | 0.7418 (6)  | 0.0108 (14) |
| O38 | 0.6598 (7)  | 0.7056 (7)  | 0.7232 (5)  | 0.0105 (13) |
| O39 | 0.3909 (7)  | 0.5004 (7)  | 0.1683 (6)  | 0.0131 (15) |
| O40 | 0.0276 (6)  | 0.0138 (7)  | -0.1249 (5) | 0.0073 (12) |
| O41 | 0.9320 (6)  | 0.1171 (6)  | 0.5108 (5)  | 0.0069 (12) |
| O42 | 1.4119 (7)  | 0.6064 (7)  | 0.9594 (6)  | 0.0116 (14) |
| O43 | 0.2645 (6)  | 0.2772 (6)  | 0.0526 (5)  | 0.0071 (12) |
| O44 | 0.0511 (7)  | 0.0281 (7)  | 0.2596 (5)  | 0.0103 (13) |
| O45 | 1.2839 (6)  | 0.9283 (6)  | 0.6082 (5)  | 0.0067 (12) |
| O46 | 0.4824 (8)  | -0.1508 (7) | 0.6994 (6)  | 0.0149 (15) |
| O47 | 0.5494 (7)  | 0.2921 (7)  | 0.8755 (6)  | 0.0134 (15) |
| O48 | 0.5400 (7)  | 0.0133 (7)  | 0.5095 (5)  | 0.0092 (13) |
| O49 | 1.1035 (7)  | 0.5088 (7)  | 0.6821 (5)  | 0.0107 (14) |
| O50 | 1.3971 (7)  | 0.4185 (7)  | 0.8959 (5)  | 0.0085 (13) |
| O51 | 0.7656 (7)  | 0.4094 (7)  | 0.5276 (6)  | 0.0122 (14) |
| O52 | 0.7513 (7)  | 0.6295 (7)  | 0.4409 (5)  | 0.0126 (14) |
| O53 | 0.6495 (6)  | 0.0488 (6)  | 0.3707 (5)  | 0.0099 (13) |
| O54 | 0.5314 (7)  | -0.1483 (7) | 0.4153 (5)  | 0.0101 (13) |
| O55 | 0.8295 (7)  | 0.7090 (7)  | 0.8037 (5)  | 0.0129 (15) |
| O56 | -0.4470 (8) | -0.0707 (7) | 0.1731 (5)  | 0.0133 (15) |
| O57 | 0.2768 (7)  | 0.1842 (7)  | 0.2484 (5)  | 0.0097 (13) |
| O58 | 0.4358 (7)  | 0.6373 (7)  | 0.5367 (5)  | 0.0103 (14) |
| O59 | 1.0652 (7)  | 0.7471 (6)  | 0.8760 (5)  | 0.0102 (14) |
| O60 | 1.3675 (7)  | 1.1918 (7)  | 0.6611 (5)  | 0.0117 (14) |

|     |             |             |             |             |
|-----|-------------|-------------|-------------|-------------|
| O61 | 0.8202 (7)  | 0.6827 (7)  | 0.6458 (5)  | 0.0097 (13) |
| O62 | 0.7357 (7)  | 0.2087 (7)  | 0.5587 (5)  | 0.0087 (13) |
| O63 | 0.5706 (7)  | 0.2649 (7)  | 0.5365 (5)  | 0.0100 (13) |
| O64 | 0.5797 (7)  | -0.0292 (7) | 0.8248 (5)  | 0.0092 (13) |
| O65 | 0.2590 (7)  | 0.1120 (7)  | -0.0379 (5) | 0.0077 (12) |
| O66 | 1.0265 (7)  | 0.4942 (7)  | 0.8319 (5)  | 0.0117 (14) |
| O67 | 0.7119 (7)  | 0.7913 (6)  | 0.0726 (6)  | 0.0100 (13) |
| O68 | 0.9610 (7)  | 0.3260 (6)  | 0.7351 (5)  | 0.0095 (13) |
| O69 | 1.2198 (7)  | 1.2483 (6)  | 0.7331 (5)  | 0.0079 (13) |
| O70 | 0.4183 (7)  | 0.2522 (7)  | 0.3644 (5)  | 0.0104 (13) |
| O71 | 1.1934 (7)  | 0.8322 (6)  | 0.7551 (5)  | 0.0095 (13) |
| O72 | 0.7546 (7)  | 0.4885 (7)  | 0.2651 (5)  | 0.0098 (13) |
| O73 | 0.7411 (7)  | -0.0050 (6) | 0.5706 (5)  | 0.0088 (13) |
| O74 | -0.0198 (7) | 0.1582 (7)  | 0.1743 (6)  | 0.0123 (14) |
| O75 | 1.2394 (7)  | 0.4825 (7)  | 0.8737 (5)  | 0.0103 (13) |
| O76 | 0.2046 (7)  | 0.4919 (8)  | 0.4384 (6)  | 0.0144 (15) |
| O77 | 0.6781 (7)  | 0.6272 (7)  | -0.0260 (5) | 0.0113 (14) |
| O78 | -0.0915 (7) | -0.0344 (7) | 0.0014 (5)  | 0.0101 (13) |
| O79 | 0.4191 (6)  | 0.0009 (6)  | 0.7583 (5)  | 0.0075 (12) |
| O80 | 1.2641 (7)  | 0.8808 (6)  | 0.9040 (5)  | 0.0102 (13) |
| O81 | 0.0902 (7)  | -0.1862 (7) | 0.1681 (5)  | 0.0118 (14) |
| O82 | 1.1375 (7)  | 0.5380 (7)  | 1.1392 (5)  | 0.0097 (13) |
| O83 | 0.5117 (7)  | 0.6940 (7)  | 0.2206 (6)  | 0.0132 (15) |
| O84 | 1.2321 (7)  | 0.6896 (6)  | 0.8393 (5)  | 0.0096 (13) |
| O85 | 1.0554 (7)  | 0.3778 (7)  | 1.0346 (6)  | 0.0124 (14) |
| O86 | 0.2824 (7)  | -0.1250 (7) | 0.1018 (5)  | 0.0121 (14) |
| O87 | 0.8678 (7)  | 0.7160 (7)  | 0.0502 (6)  | 0.0122 (14) |
| O88 | 0.7678 (7)  | 0.7014 (7)  | 0.2884 (5)  | 0.0116 (14) |
| O89 | 0.7596 (7)  | 0.3725 (7)  | 0.8317 (5)  | 0.0100 (13) |
| O90 | 1.1728 (7)  | 1.1343 (7)  | 0.5979 (5)  | 0.0116 (14) |
| O91 | 0.8330 (7)  | 0.3433 (8)  | 0.2255 (6)  | 0.0148 (15) |
| O92 | 0.3746 (8)  | 0.5621 (7)  | 0.3182 (6)  | 0.0144 (15) |
| O93 | 0.6843 (7)  | 0.6001 (7)  | 0.1273 (5)  | 0.0096 (13) |
| O94 | 1.1272 (8)  | 0.5836 (7)  | 0.9885 (5)  | 0.0147 (15) |
| O95 | 0.5482 (7)  | 0.5266 (7)  | 0.2737 (5)  | 0.0101 (13) |
| O96 | 0.6397 (8)  | 0.3272 (7)  | 0.1694 (6)  | 0.0157 (16) |

---

**Table S3.** Anisotropic Displacement Parameters ( $\text{\AA}^2$ ) for  $\text{Ba}_3[\text{Al}(\text{PO}_4)_3]$ .

| Atom | $U_{11}$    | $U_{22}$    | $U_{33}$    | $U_{23}$      | $U_{13}$      | $U_{12}$      |
|------|-------------|-------------|-------------|---------------|---------------|---------------|
| Ba01 | 0.0047 (2)  | 0.0062 (2)  | 0.0056 (2)  | 0.00208 (18)  | 0.00068 (17)  | 0.00069 (17)  |
| Ba02 | 0.0067 (2)  | 0.0057 (2)  | 0.0068 (2)  | 0.00239 (19)  | -0.00116 (18) | 0.00007 (17)  |
| Ba03 | 0.0061 (2)  | 0.0054 (2)  | 0.0052 (2)  | 0.00165 (18)  | 0.00017 (18)  | 0.00004 (17)  |
| Ba04 | 0.0057 (2)  | 0.0048 (2)  | 0.0086 (2)  | 0.00188 (18)  | -0.00140 (18) | -0.00035 (18) |
| Ba05 | 0.0052 (2)  | 0.0069 (2)  | 0.0072 (2)  | 0.00116 (19)  | -0.00126 (18) | 0.00174 (18)  |
| Ba06 | 0.0049 (2)  | 0.0065 (2)  | 0.0068 (2)  | 0.00243 (18)  | 0.00117 (18)  | 0.00077 (18)  |
| Ba07 | 0.0048 (2)  | 0.0047 (2)  | 0.0053 (2)  | 0.00040 (18)  | -0.00029 (17) | -0.00023 (17) |
| Ba08 | 0.0044 (2)  | 0.0078 (2)  | 0.0057 (2)  | 0.00081 (19)  | -0.00053 (18) | -0.00088 (18) |
| Ba11 | 0.0044 (2)  | 0.0076 (2)  | 0.0072 (2)  | 0.00183 (19)  | 0.00021 (18)  | 0.00105 (18)  |
| Ba12 | 0.0043 (2)  | 0.0060 (2)  | 0.0062 (2)  | 0.00201 (18)  | -0.00025 (17) | -0.00034 (17) |
| Ba13 | 0.0047 (2)  | 0.0046 (2)  | 0.0064 (2)  | 0.00130 (18)  | -0.00019 (17) | -0.00003 (17) |
| Ba14 | 0.0052 (2)  | 0.0043 (2)  | 0.0067 (2)  | 0.00109 (18)  | 0.00039 (18)  | 0.00021 (17)  |
| Ba15 | 0.0038 (2)  | 0.0058 (2)  | 0.0060 (2)  | 0.00156 (18)  | 0.00013 (17)  | -0.00014 (17) |
| Ba16 | 0.0065 (2)  | 0.0072 (2)  | 0.0067 (2)  | 0.00327 (19)  | -0.00192 (18) | -0.00198 (18) |
| Ba17 | 0.0053 (2)  | 0.0061 (2)  | 0.0062 (2)  | 0.00302 (18)  | -0.00095 (18) | -0.00089 (17) |
| Ba18 | 0.0071 (2)  | 0.0048 (2)  | 0.0075 (2)  | 0.00085 (19)  | -0.00084 (18) | 0.00001 (18)  |
| Ba19 | 0.0049 (2)  | 0.0046 (2)  | 0.0074 (2)  | -0.00001 (18) | 0.00136 (18)  | -0.00013 (18) |
| Ba20 | 0.0056 (2)  | 0.0060 (2)  | 0.0089 (2)  | 0.00011 (19)  | -0.00061 (19) | -0.00089 (18) |
| Ba21 | 0.0080 (2)  | 0.0059 (2)  | 0.0075 (2)  | 0.00274 (19)  | 0.00147 (19)  | 0.00013 (18)  |
| Ba22 | 0.0055 (2)  | 0.0066 (2)  | 0.0060 (2)  | 0.00191 (18)  | -0.00005 (18) | 0.00117 (18)  |
| Ba23 | 0.0064 (2)  | 0.0082 (2)  | 0.0069 (2)  | 0.00138 (19)  | 0.00097 (19)  | -0.00151 (19) |
| Ba24 | 0.0073 (2)  | 0.0053 (2)  | 0.0092 (2)  | 0.00181 (19)  | 0.00163 (19)  | 0.00086 (18)  |
| Ba25 | 0.0110 (3)  | 0.0063 (2)  | 0.0089 (3)  | -0.0008 (2)   | -0.0014 (2)   | 0.00192 (19)  |
| Ba26 | 0.0065 (2)  | 0.0122 (3)  | 0.0081 (2)  | 0.0023 (2)    | 0.00096 (19)  | -0.0011 (2)   |
| P01  | 0.0047 (10) | 0.0067 (10) | 0.0048 (10) | 0.0027 (8)    | -0.0002 (8)   | 0.0011 (8)    |
| P02  | 0.0038 (10) | 0.0042 (10) | 0.0069 (10) | 0.0013 (8)    | 0.0003 (8)    | 0.0010 (8)    |
| P03  | 0.0058 (10) | 0.0061 (10) | 0.0089 (11) | 0.0035 (9)    | -0.0030 (9)   | -0.0027 (8)   |
| P04  | 0.0037 (10) | 0.0051 (10) | 0.0060 (10) | 0.0007 (8)    | -0.0001 (8)   | 0.0002 (8)    |
| P05  | 0.0079 (11) | 0.0055 (10) | 0.0093 (11) | 0.0028 (9)    | 0.0020 (9)    | 0.0004 (9)    |
| P06  | 0.0036 (10) | 0.0047 (10) | 0.0061 (10) | 0.0017 (8)    | -0.0001 (8)   | 0.0002 (8)    |
| P07  | 0.0045 (10) | 0.0057 (10) | 0.0089 (11) | -0.0008 (8)   | 0.0022 (9)    | -0.0010 (8)   |
| P08  | 0.0090 (11) | 0.0056 (10) | 0.0081 (11) | 0.0026 (9)    | 0.0015 (9)    | 0.0008 (8)    |
| P09  | 0.0067 (11) | 0.0080 (11) | 0.0070 (11) | 0.0033 (9)    | -0.0027 (9)   | -0.0034 (8)   |
| P10  | 0.0066 (10) | 0.0048 (10) | 0.0074 (11) | 0.0022 (8)    | -0.0009 (9)   | -0.0004 (8)   |
| P11  | 0.0056 (10) | 0.0071 (11) | 0.0096 (11) | 0.0028 (9)    | 0.0030 (9)    | 0.0020 (9)    |
| P12  | 0.0032 (10) | 0.0048 (10) | 0.0047 (10) | 0.0006 (8)    | 0.0004 (8)    | 0.0000 (8)    |
| P13  | 0.0039 (10) | 0.0043 (10) | 0.0079 (11) | 0.0001 (8)    | -0.0024 (8)   | 0.0004 (8)    |

|     |             |             |             |             |              |              |
|-----|-------------|-------------|-------------|-------------|--------------|--------------|
| P14 | 0.0058 (10) | 0.0059 (10) | 0.0087 (11) | 0.0011 (9)  | -0.0021 (9)  | -0.0012 (8)  |
| P15 | 0.0074 (11) | 0.0063 (10) | 0.0064 (10) | 0.0045 (9)  | 0.0003 (8)   | -0.0001 (8)  |
| P16 | 0.0044 (10) | 0.0056 (10) | 0.0075 (11) | 0.0017 (8)  | 0.0003 (8)   | -0.0014 (8)  |
| P17 | 0.0063 (11) | 0.0038 (10) | 0.0092 (11) | 0.0018 (8)  | 0.0003 (9)   | -0.0003 (8)  |
| P18 | 0.0046 (10) | 0.0081 (11) | 0.0090 (11) | 0.0028 (9)  | 0.0016 (9)   | 0.0015 (9)   |
| P19 | 0.0093 (11) | 0.0061 (10) | 0.0050 (10) | 0.0024 (9)  | -0.0009 (9)  | -0.0009 (8)  |
| P20 | 0.0068 (11) | 0.0078 (11) | 0.0065 (11) | 0.0011 (9)  | -0.0013 (9)  | 0.0009 (8)   |
| P21 | 0.0060 (10) | 0.0056 (10) | 0.0076 (11) | 0.0021 (8)  | 0.0022 (8)   | 0.0006 (8)   |
| P22 | 0.0052 (10) | 0.0067 (10) | 0.0060 (10) | 0.0004 (8)  | 0.0013 (8)   | -0.0010 (8)  |
| A01 | 0.0060 (13) | 0.0039 (12) | 0.0067 (13) | 0.0008 (10) | -0.0002 (10) | 0.0013 (10)  |
| A02 | 0.0054 (13) | 0.0049 (13) | 0.0077 (13) | 0.0021 (10) | 0.0005 (10)  | 0.0003 (10)  |
| A03 | 0.0043 (12) | 0.0070 (13) | 0.0065 (13) | 0.0019 (10) | -0.0017 (10) | -0.0009 (10) |
| P23 | 0.0072 (11) | 0.0070 (10) | 0.0070 (11) | 0.0034 (9)  | -0.0013 (9)  | -0.0005 (8)  |
| A04 | 0.0058 (13) | 0.0048 (12) | 0.0054 (12) | 0.0024 (10) | -0.0005 (10) | 0.0005 (10)  |
| P24 | 0.0103 (11) | 0.0057 (10) | 0.0058 (11) | 0.0019 (9)  | 0.0000 (9)   | 0.0011 (8)   |
| A05 | 0.0055 (13) | 0.0074 (13) | 0.0055 (13) | 0.0035 (11) | -0.0007 (10) | -0.0004 (10) |
| A06 | 0.0060 (13) | 0.0058 (13) | 0.0071 (13) | 0.0020 (11) | 0.0008 (10)  | 0.0004 (10)  |
| A07 | 0.0076 (13) | 0.0054 (13) | 0.0053 (13) | 0.0024 (11) | -0.0014 (10) | 0.0001 (10)  |
| A08 | 0.0048 (13) | 0.0065 (13) | 0.0041 (12) | 0.0028 (10) | -0.0008 (10) | -0.0005 (10) |
| O01 | 0.007 (3)   | 0.010 (3)   | 0.008 (3)   | 0.004 (2)   | -0.003 (2)   | 0.000 (2)    |
| O02 | 0.004 (3)   | 0.014 (3)   | 0.008 (3)   | 0.000 (3)   | -0.001 (2)   | 0.002 (3)    |
| O03 | 0.002 (3)   | 0.010 (3)   | 0.010 (3)   | 0.002 (2)   | 0.001 (2)    | -0.001 (2)   |
| O04 | 0.011 (3)   | 0.009 (3)   | 0.014 (3)   | 0.007 (3)   | -0.001 (3)   | 0.000 (3)    |
| O05 | 0.007 (3)   | 0.011 (3)   | 0.010 (3)   | 0.003 (3)   | 0.002 (2)    | 0.001 (3)    |
| O06 | 0.007 (3)   | 0.012 (3)   | 0.008 (3)   | 0.006 (3)   | 0.000 (2)    | -0.004 (2)   |
| O07 | 0.006 (3)   | 0.008 (3)   | 0.008 (3)   | 0.006 (2)   | -0.002 (2)   | -0.002 (2)   |
| O08 | 0.009 (3)   | 0.006 (3)   | 0.008 (3)   | 0.003 (2)   | -0.002 (2)   | 0.001 (2)    |
| O09 | 0.015 (3)   | 0.005 (3)   | 0.010 (3)   | 0.002 (3)   | -0.002 (3)   | -0.002 (2)   |
| O10 | 0.006 (3)   | 0.009 (3)   | 0.013 (3)   | -0.001 (2)  | 0.001 (3)    | 0.005 (3)    |
| O11 | 0.007 (3)   | 0.008 (3)   | 0.011 (3)   | 0.004 (2)   | 0.001 (2)    | 0.000 (2)    |
| O12 | 0.013 (3)   | 0.006 (3)   | 0.013 (3)   | 0.005 (3)   | 0.001 (3)    | 0.002 (2)    |
| O13 | 0.013 (3)   | 0.010 (3)   | 0.010 (3)   | 0.001 (3)   | 0.003 (3)    | -0.004 (3)   |
| O14 | 0.015 (3)   | 0.016 (3)   | 0.006 (3)   | 0.005 (3)   | 0.000 (3)    | 0.003 (3)    |
| O15 | 0.004 (3)   | 0.008 (3)   | 0.010 (3)   | 0.002 (2)   | 0.002 (2)    | 0.000 (2)    |
| O16 | 0.006 (3)   | 0.007 (3)   | 0.008 (3)   | 0.002 (2)   | -0.002 (2)   | 0.002 (2)    |
| O17 | 0.012 (3)   | 0.017 (3)   | 0.012 (3)   | 0.005 (3)   | -0.006 (3)   | -0.004 (3)   |
| O18 | 0.007 (3)   | 0.011 (3)   | 0.016 (3)   | 0.006 (3)   | -0.001 (3)   | 0.000 (3)    |
| O19 | 0.007 (3)   | 0.004 (3)   | 0.011 (3)   | 0.001 (2)   | 0.002 (2)    | -0.002 (2)   |
| O20 | 0.008 (3)   | 0.008 (3)   | 0.005 (3)   | 0.002 (2)   | -0.002 (2)   | 0.000 (2)    |
| O21 | 0.012 (3)   | 0.005 (3)   | 0.009 (3)   | 0.002 (2)   | -0.002 (3)   | -0.001 (2)   |

|     |             |             |             |             |              |              |
|-----|-------------|-------------|-------------|-------------|--------------|--------------|
| O22 | 0.008 (3)   | 0.007 (3)   | 0.010 (3)   | 0.000 (2)   | 0.000 (2)    | -0.004 (2)   |
| O23 | 0.016 (3)   | 0.011 (3)   | 0.012 (3)   | 0.011 (3)   | -0.005 (3)   | -0.002 (3)   |
| O24 | 0.013 (3)   | 0.012 (3)   | 0.008 (3)   | 0.006 (3)   | -0.005 (3)   | -0.002 (2)   |
| O25 | 0.006 (3)   | 0.013 (3)   | 0.005 (3)   | 0.003 (2)   | -0.003 (2)   | -0.001 (2)   |
| O26 | 0.008 (3)   | 0.011 (3)   | 0.016 (3)   | 0.005 (3)   | 0.000 (3)    | 0.003 (3)    |
| O27 | 0.0082 (17) | 0.0096 (17) | 0.0109 (17) | 0.0040 (12) | -0.0005 (12) | -0.0007 (12) |
| O28 | 0.007 (3)   | 0.003 (3)   | 0.011 (3)   | 0.001 (2)   | 0.002 (2)    | 0.000 (2)    |
| O29 | 0.007 (3)   | 0.010 (3)   | 0.010 (3)   | 0.003 (2)   | -0.002 (2)   | 0.004 (2)    |
| O30 | 0.007 (3)   | 0.008 (3)   | 0.013 (3)   | 0.004 (2)   | -0.003 (2)   | -0.001 (2)   |
| O31 | 0.009 (3)   | 0.007 (3)   | 0.010 (3)   | 0.000 (2)   | 0.001 (2)    | 0.000 (2)    |
| O32 | 0.007 (3)   | 0.012 (3)   | 0.013 (3)   | 0.004 (3)   | 0.000 (3)    | 0.003 (3)    |
| O33 | 0.011 (3)   | 0.009 (3)   | 0.013 (3)   | 0.000 (3)   | 0.006 (3)    | -0.003 (3)   |
| O34 | 0.004 (3)   | 0.009 (3)   | 0.010 (3)   | 0.000 (2)   | -0.002 (2)   | 0.000 (2)    |
| O35 | 0.012 (3)   | 0.010 (3)   | 0.008 (3)   | 0.007 (3)   | -0.005 (2)   | -0.004 (2)   |
| O36 | 0.011 (3)   | 0.017 (4)   | 0.013 (3)   | 0.006 (3)   | 0.001 (3)    | -0.007 (3)   |
| O37 | 0.010 (3)   | 0.005 (3)   | 0.019 (4)   | 0.003 (2)   | 0.005 (3)    | 0.004 (3)    |
| O38 | 0.010 (3)   | 0.013 (3)   | 0.013 (3)   | 0.010 (2)   | -0.001 (2)   | -0.002 (2)   |
| O39 | 0.011 (3)   | 0.010 (3)   | 0.014 (3)   | -0.002 (3)  | -0.004 (3)   | 0.002 (3)    |
| O40 | 0.007 (3)   | 0.010 (3)   | 0.007 (3)   | 0.005 (2)   | 0.001 (2)    | 0.001 (2)    |
| O41 | 0.005 (3)   | 0.005 (3)   | 0.009 (3)   | 0.000 (2)   | 0.002 (2)    | 0.004 (2)    |
| O42 | 0.008 (3)   | 0.012 (3)   | 0.014 (3)   | 0.003 (3)   | 0.003 (3)    | 0.000 (3)    |
| O43 | 0.005 (3)   | 0.006 (3)   | 0.012 (3)   | 0.004 (2)   | 0.001 (2)    | -0.001 (2)   |
| O44 | 0.006 (3)   | 0.016 (3)   | 0.009 (3)   | 0.004 (3)   | 0.000 (2)    | 0.002 (3)    |
| O45 | 0.005 (3)   | 0.005 (3)   | 0.009 (3)   | 0.001 (2)   | -0.001 (2)   | -0.003 (2)   |
| O46 | 0.015 (4)   | 0.009 (3)   | 0.019 (4)   | 0.003 (3)   | 0.000 (3)    | -0.002 (3)   |
| O47 | 0.011 (3)   | 0.013 (3)   | 0.017 (4)   | 0.005 (3)   | -0.002 (3)   | 0.003 (3)    |
| O48 | 0.009 (3)   | 0.013 (3)   | 0.009 (3)   | 0.008 (3)   | -0.003 (2)   | -0.005 (3)   |
| O49 | 0.008 (3)   | 0.007 (3)   | 0.016 (3)   | 0.001 (2)   | 0.007 (3)    | 0.000 (3)    |
| O50 | 0.008 (3)   | 0.011 (3)   | 0.008 (3)   | 0.004 (2)   | 0.000 (2)    | -0.002 (2)   |
| O51 | 0.009 (3)   | 0.012 (3)   | 0.016 (3)   | 0.003 (3)   | -0.001 (3)   | 0.002 (3)    |
| O52 | 0.015 (3)   | 0.010 (3)   | 0.012 (3)   | 0.004 (3)   | 0.002 (3)    | -0.001 (3)   |
| O53 | 0.005 (3)   | 0.005 (3)   | 0.018 (3)   | 0.000 (2)   | 0.003 (2)    | -0.002 (2)   |
| O54 | 0.010 (3)   | 0.008 (3)   | 0.014 (3)   | 0.005 (3)   | -0.001 (3)   | -0.002 (3)   |
| O55 | 0.012 (3)   | 0.014 (3)   | 0.010 (3)   | 0.003 (3)   | -0.004 (3)   | 0.003 (3)    |
| O56 | 0.016 (4)   | 0.014 (3)   | 0.009 (3)   | 0.005 (3)   | 0.001 (3)    | 0.003 (3)    |
| O57 | 0.012 (3)   | 0.010 (3)   | 0.004 (3)   | 0.001 (2)   | -0.001 (2)   | -0.003 (2)   |
| O58 | 0.013 (3)   | 0.009 (3)   | 0.006 (3)   | 0.002 (3)   | 0.004 (3)    | 0.002 (2)    |
| O59 | 0.009 (3)   | 0.005 (3)   | 0.013 (3)   | -0.002 (2)  | 0.006 (3)    | -0.004 (2)   |
| O60 | 0.008 (3)   | 0.017 (3)   | 0.013 (3)   | 0.008 (3)   | 0.003 (3)    | -0.002 (3)   |
| O61 | 0.007 (3)   | 0.013 (3)   | 0.009 (3)   | 0.003 (3)   | 0.001 (2)    | -0.001 (3)   |

|     |           |           |           |            |            |            |
|-----|-----------|-----------|-----------|------------|------------|------------|
| O62 | 0.008 (3) | 0.009 (3) | 0.011 (3) | 0.006 (2)  | 0.001 (2)  | 0.001 (2)  |
| O63 | 0.009 (3) | 0.009 (3) | 0.015 (3) | 0.006 (3)  | -0.001 (3) | 0.001 (3)  |
| O64 | 0.010 (3) | 0.007 (3) | 0.011 (3) | 0.003 (2)  | -0.003 (3) | 0.004 (2)  |
| O65 | 0.008 (3) | 0.009 (3) | 0.007 (3) | 0.004 (2)  | -0.003 (2) | -0.001 (2) |
| O66 | 0.010 (3) | 0.011 (3) | 0.014 (3) | 0.005 (3)  | 0.002 (3)  | 0.000 (3)  |
| O67 | 0.007 (3) | 0.005 (3) | 0.020 (4) | 0.004 (2)  | -0.001 (3) | -0.002 (3) |
| O68 | 0.008 (3) | 0.006 (3) | 0.015 (3) | 0.003 (2)  | 0.003 (3)  | 0.002 (2)  |
| O69 | 0.011 (3) | 0.007 (3) | 0.009 (3) | 0.006 (2)  | 0.003 (2)  | -0.002 (2) |
| O70 | 0.006 (3) | 0.009 (3) | 0.013 (3) | 0.000 (2)  | -0.003 (3) | -0.001 (3) |
| O71 | 0.010 (3) | 0.006 (3) | 0.012 (3) | 0.002 (2)  | 0.000 (3)  | 0.001 (2)  |
| O72 | 0.009 (3) | 0.010 (3) | 0.011 (3) | 0.004 (2)  | -0.004 (2) | 0.000 (2)  |
| O73 | 0.008 (3) | 0.004 (3) | 0.015 (3) | 0.003 (2)  | -0.002 (3) | 0.002 (2)  |
| O74 | 0.012 (3) | 0.004 (3) | 0.020 (4) | 0.001 (3)  | 0.003 (3)  | -0.002 (3) |
| O75 | 0.007 (3) | 0.009 (3) | 0.017 (3) | 0.004 (2)  | 0.002 (3)  | -0.002 (3) |
| O76 | 0.011 (3) | 0.021 (4) | 0.012 (3) | 0.008 (3)  | -0.005 (3) | -0.005 (3) |
| O77 | 0.011 (3) | 0.012 (3) | 0.008 (3) | 0.002 (3)  | 0.000 (3)  | -0.001 (3) |
| O78 | 0.014 (3) | 0.013 (3) | 0.007 (3) | 0.008 (3)  | 0.004 (3)  | 0.002 (2)  |
| O79 | 0.005 (3) | 0.010 (3) | 0.006 (3) | 0.002 (2)  | -0.001 (2) | 0.000 (2)  |
| O80 | 0.012 (3) | 0.003 (3) | 0.014 (3) | 0.001 (2)  | 0.001 (3)  | 0.001 (2)  |
| O81 | 0.009 (3) | 0.016 (3) | 0.011 (3) | 0.005 (3)  | -0.005 (3) | 0.000 (3)  |
| O82 | 0.009 (3) | 0.009 (3) | 0.012 (3) | 0.004 (2)  | -0.001 (3) | 0.000 (2)  |
| O83 | 0.011 (3) | 0.012 (3) | 0.015 (3) | 0.003 (3)  | -0.003 (3) | 0.003 (3)  |
| O84 | 0.007 (3) | 0.005 (3) | 0.013 (3) | -0.001 (2) | 0.001 (3)  | 0.005 (2)  |
| O85 | 0.012 (3) | 0.009 (3) | 0.014 (3) | 0.003 (3)  | -0.003 (3) | 0.000 (3)  |
| O86 | 0.014 (3) | 0.013 (3) | 0.011 (3) | 0.007 (3)  | 0.000 (3)  | 0.006 (3)  |
| O87 | 0.008 (3) | 0.013 (3) | 0.016 (3) | 0.004 (3)  | -0.001 (3) | -0.003 (3) |
| O88 | 0.015 (3) | 0.009 (3) | 0.012 (3) | 0.006 (3)  | -0.004 (3) | -0.001 (2) |
| O89 | 0.010 (3) | 0.010 (3) | 0.007 (3) | 0.001 (3)  | 0.001 (2)  | 0.003 (2)  |
| O90 | 0.016 (3) | 0.010 (3) | 0.012 (3) | 0.009 (3)  | -0.001 (3) | 0.001 (3)  |
| O91 | 0.012 (3) | 0.015 (3) | 0.019 (4) | 0.008 (3)  | 0.002 (3)  | 0.000 (3)  |
| O92 | 0.018 (4) | 0.014 (3) | 0.012 (3) | 0.007 (3)  | 0.002 (3)  | 0.001 (3)  |
| O93 | 0.012 (3) | 0.011 (3) | 0.007 (3) | 0.006 (3)  | 0.001 (2)  | -0.002 (2) |
| O94 | 0.021 (4) | 0.009 (3) | 0.011 (3) | 0.002 (3)  | 0.008 (3)  | 0.003 (3)  |
| O95 | 0.007 (3) | 0.008 (3) | 0.014 (3) | 0.001 (2)  | 0.000 (3)  | 0.005 (3)  |
| O96 | 0.019 (4) | 0.009 (3) | 0.012 (3) | -0.003 (3) | -0.004 (3) | -0.002 (3) |

**Table S4.** Bond Lengths for Ba<sub>3</sub>[Al(PO<sub>4</sub>)<sub>3</sub>].

| Atom   | Atom               | Length/Å | Atom   | Atom                | Length/Å  |
|--------|--------------------|----------|--------|---------------------|-----------|
| Ba(01) | O(01) <sup>1</sup> | 2.815(8) | Ba(20) | O(43) <sup>9</sup>  | 2.981(8)  |
| Ba(01) | O(07)              | 2.714(7) | Ba(20) | O(47) <sup>13</sup> | 3.138(9)  |
| Ba(01) | O(23) <sup>1</sup> | 2.914(9) | Ba(20) | O(50)               | 2.731(8)  |
| Ba(01) | O(25) <sup>1</sup> | 2.794(8) | Ba(20) | O(77) <sup>9</sup>  | 2.970(8)  |
| Ba(01) | O(31) <sup>1</sup> | 2.940(8) | Ba(20) | O(93) <sup>9</sup>  | 2.926(8)  |
| Ba(01) | O(56)              | 2.985(9) | Ba(20) | O(96) <sup>9</sup>  | 3.045(10) |
| Ba(01) | O(57) <sup>1</sup> | 3.103(9) | Ba(21) | O(24)               | 2.961(8)  |
| Ba(01) | O(70) <sup>1</sup> | 3.054(8) | Ba(21) | O(34) <sup>13</sup> | 2.784(8)  |
| Ba(01) | O(96) <sup>1</sup> | 2.808(8) | Ba(21) | O(39) <sup>8</sup>  | 3.097(9)  |
| Ba(02) | O(10) <sup>2</sup> | 3.046(8) | Ba(21) | O(42) <sup>11</sup> | 2.720(8)  |
| Ba(02) | O(14) <sup>2</sup> | 2.838(9) | Ba(21) | O(56) <sup>13</sup> | 3.084(9)  |
| Ba(02) | O(22) <sup>3</sup> | 2.975(8) | Ba(21) | O(82) <sup>11</sup> | 3.089(8)  |
| Ba(02) | O(41) <sup>3</sup> | 2.848(8) | Ba(21) | O(83) <sup>8</sup>  | 2.752(9)  |
| Ba(02) | O(49) <sup>3</sup> | 2.892(8) | Ba(21) | O(86)               | 2.667(8)  |
| Ba(02) | O(68) <sup>3</sup> | 2.759(8) | Ba(22) | O(02)               | 2.711(8)  |
| Ba(02) | O(69)              | 2.880(8) | Ba(22) | O(15) <sup>6</sup>  | 2.811(8)  |
| Ba(02) | O(90)              | 2.706(8) | Ba(22) | O(25)               | 2.860(8)  |
| Ba(03) | O(35)              | 2.815(8) | Ba(22) | O(45) <sup>6</sup>  | 2.717(8)  |
| Ba(03) | O(36)              | 2.883(8) | Ba(22) | O(48)               | 2.820(8)  |
| Ba(03) | O(39)              | 2.807(8) | Ba(22) | O(60) <sup>6</sup>  | 2.740(8)  |
| Ba(03) | O(43)              | 2.702(7) | Ba(22) | O(63)               | 2.634(8)  |
| Ba(03) | O(57)              | 3.111(9) | Ba(22) | O(70)               | 2.785(8)  |
| Ba(03) | O(74)              | 2.678(8) | Ba(22) | O(90) <sup>6</sup>  | 3.075(8)  |
| Ba(03) | O(82) <sup>4</sup> | 2.680(8) | Ba(23) | O(04) <sup>8</sup>  | 2.902(8)  |
| Ba(03) | O(85) <sup>4</sup> | 2.806(9) | Ba(23) | O(15) <sup>6</sup>  | 2.791(8)  |
| Ba(04) | O(14)              | 2.791(9) | Ba(23) | O(19) <sup>6</sup>  | 2.763(8)  |
| Ba(04) | O(31) <sup>1</sup> | 2.831(8) | Ba(23) | O(24)               | 2.645(8)  |
| Ba(04) | O(33)              | 2.658(8) | Ba(23) | O(25)               | 2.892(8)  |
| Ba(04) | O(36)              | 2.915(9) | Ba(23) | O(54)               | 2.726(8)  |
| Ba(04) | O(41) <sup>1</sup> | 2.888(8) | Ba(23) | O(76) <sup>8</sup>  | 3.112(10) |
| Ba(04) | O(53) <sup>1</sup> | 2.694(8) | Ba(23) | O(92) <sup>8</sup>  | 3.086(9)  |
| Ba(04) | O(62) <sup>1</sup> | 3.036(8) | Ba(24) | O(29) <sup>1</sup>  | 2.882(8)  |
| Ba(04) | O(91) <sup>1</sup> | 2.966(9) | Ba(24) | O(30) <sup>5</sup>  | 2.760(8)  |
| Ba(05) | O(08) <sup>5</sup> | 2.746(8) | Ba(24) | O(34) <sup>5</sup>  | 3.110(8)  |
| Ba(05) | O(40) <sup>5</sup> | 2.886(8) | Ba(24) | O(38)               | 2.698(8)  |
| Ba(05) | O(43) <sup>5</sup> | 2.771(8) | Ba(24) | O(42) <sup>1</sup>  | 2.975(8)  |
| Ba(05) | O(50) <sup>3</sup> | 2.981(8) | Ba(24) | O(64) <sup>3</sup>  | 2.764(8)  |

|        |                    |          |        |                     |           |
|--------|--------------------|----------|--------|---------------------|-----------|
| Ba(05) | O(65) <sup>5</sup> | 2.744(8) | Ba(24) | O(77) <sup>15</sup> | 2.859(9)  |
| Ba(05) | O(69)              | 2.695(7) | Ba(25) | O(07) <sup>13</sup> | 2.921(7)  |
| Ba(05) | O(75) <sup>3</sup> | 2.772(8) | Ba(25) | O(09) <sup>10</sup> | 2.886(9)  |
| Ba(06) | O(02)              | 2.660(8) | Ba(25) | O(12) <sup>10</sup> | 2.792(9)  |
| Ba(06) | O(03) <sup>6</sup> | 3.027(8) | Ba(25) | O(26) <sup>10</sup> | 2.964(8)  |
| Ba(06) | O(06) <sup>6</sup> | 2.772(8) | Ba(25) | O(27) <sup>13</sup> | 2.895(8)  |
| Ba(06) | O(15) <sup>6</sup> | 2.804(8) | Ba(25) | O(85) <sup>10</sup> | 2.897(9)  |
| Ba(06) | O(18) <sup>6</sup> | 2.889(8) | Ba(25) | O(91)               | 2.733(9)  |
| Ba(06) | O(28) <sup>1</sup> | 2.685(7) | Ba(26) | O(04) <sup>8</sup>  | 2.693(9)  |
| Ba(06) | O(41) <sup>1</sup> | 2.868(8) | Ba(26) | O(18) <sup>6</sup>  | 3.034(8)  |
| Ba(06) | O(44)              | 2.963(8) | Ba(26) | O(24)               | 3.006(8)  |
| Ba(07) | O(10) <sup>8</sup> | 2.782(9) | Ba(26) | O(26) <sup>11</sup> | 2.906(9)  |
| Ba(07) | O(19) <sup>6</sup> | 2.719(8) | Ba(26) | O(72) <sup>6</sup>  | 2.912(8)  |
| Ba(07) | O(29) <sup>6</sup> | 2.830(8) | Ba(26) | O(81)               | 2.698(9)  |
| Ba(07) | O(46)              | 2.604(9) | Ba(26) | O(82) <sup>11</sup> | 2.743(8)  |
| Ba(07) | O(49) <sup>6</sup> | 2.648(8) | P(01)  | O(08)               | 1.525(8)  |
| Ba(07) | O(58) <sup>8</sup> | 2.758(8) | P(01)  | O(30)               | 1.515(8)  |
| Ba(07) | O(84) <sup>6</sup> | 2.878(8) | P(01)  | O(40)               | 1.523(8)  |
| Ba(08) | O(03) <sup>8</sup> | 2.755(7) | P(01)  | O(78)               | 1.575(8)  |
| Ba(08) | O(11) <sup>8</sup> | 2.797(8) | P(02)  | O(07)               | 1.527(8)  |
| Ba(08) | O(28)              | 2.648(8) | P(02)  | O(27)               | 1.577(8)  |
| Ba(08) | O(40) <sup>9</sup> | 2.774(8) | P(02)  | O(34)               | 1.539(8)  |
| Ba(08) | O(55) <sup>8</sup> | 2.715(8) | P(02)  | O(56)               | 1.518(9)  |
| Ba(08) | O(61) <sup>8</sup> | 2.975(8) | P(03)  | O(04)               | 1.529(8)  |
| Ba(08) | O(71) <sup>8</sup> | 3.089(8) | P(03)  | O(14)               | 1.544(8)  |
| Ba(11) | O(05) <sup>2</sup> | 2.851(8) | P(03)  | O(36)               | 1.521(9)  |
| Ba(11) | O(10) <sup>2</sup> | 2.800(8) | P(03)  | O(76)               | 1.589(9)  |
| Ba(11) | O(29) <sup>3</sup> | 2.908(8) | P(04)  | O(22)               | 1.521(8)  |
| Ba(11) | O(37) <sup>2</sup> | 2.785(8) | P(04)  | O(28)               | 1.536(8)  |
| Ba(11) | O(47) <sup>2</sup> | 2.964(9) | P(04)  | O(41)               | 1.526(8)  |
| Ba(11) | O(50) <sup>3</sup> | 2.766(8) | P(04)  | O(73)               | 1.587(8)  |
| Ba(11) | O(60)              | 2.676(9) | P(05)  | O(31)               | 1.526(8)  |
| Ba(11) | O(69)              | 2.999(8) | P(05)  | O(72)               | 1.603(9)  |
| Ba(12) | O(06) <sup>6</sup> | 2.698(8) | P(05)  | O(91)               | 1.507(9)  |
| Ba(12) | O(21)              | 2.830(8) | P(05)  | O(96)               | 1.524(10) |
| Ba(12) | O(33)              | 2.790(8) | P(06)  | O(01)               | 1.525(8)  |
| Ba(12) | O(53) <sup>1</sup> | 2.721(8) | P(06)  | O(16)               | 1.585(8)  |
| Ba(12) | O(54) <sup>1</sup> | 2.706(8) | P(06)  | O(43)               | 1.534(8)  |
| Ba(12) | O(56)              | 2.661(9) | P(06)  | O(65)               | 1.530(8)  |
| Ba(12) | O(83) <sup>6</sup> | 2.708(9) | P(07)  | O(21)               | 1.567(8)  |



|        |                     |          |       |       |          |
|--------|---------------------|----------|-------|-------|----------|
| Ba(12) | O(88) <sup>6</sup>  | 2.855(8) | P(07) | O(33) | 1.516(8) |
| Ba(13) | O(05)               | 2.905(8) | P(07) | O(44) | 1.571(9) |
| Ba(13) | O(17)               | 2.743(9) | P(07) | O(74) | 1.499(9) |
| Ba(13) | O(31)               | 2.732(8) | P(08) | O(67) | 1.564(8) |
| Ba(13) | O(51)               | 2.743(9) | P(08) | O(77) | 1.524(9) |
| Ba(13) | O(52)               | 2.626(8) | P(08) | O(87) | 1.527(8) |
| Ba(13) | O(63)               | 2.622(8) | P(08) | O(93) | 1.559(8) |
| Ba(13) | O(70)               | 2.694(8) | P(09) | O(06) | 1.524(8) |
| Ba(13) | O(72)               | 3.146(8) | P(09) | O(18) | 1.517(8) |
| Ba(13) | O(95)               | 2.911(8) | P(09) | O(52) | 1.519(9) |
| Ba(14) | O(09) <sup>10</sup> | 2.742(8) | P(09) | O(88) | 1.601(9) |
| Ba(14) | O(26) <sup>10</sup> | 2.815(9) | P(10) | O(02) | 1.498(8) |
| Ba(14) | O(55) <sup>10</sup> | 2.716(9) | P(10) | O(35) | 1.567(8) |
| Ba(14) | O(59) <sup>10</sup> | 2.677(7) | P(10) | O(57) | 1.557(8) |
| Ba(14) | O(66) <sup>10</sup> | 2.951(8) | P(10) | O(70) | 1.521(8) |
| Ba(14) | O(77)               | 2.883(8) | P(11) | O(09) | 1.535(9) |
| Ba(14) | O(87)               | 2.659(8) | P(11) | O(12) | 1.522(8) |
| Ba(14) | O(89) <sup>10</sup> | 2.909(8) | P(11) | O(47) | 1.525(9) |
| Ba(15) | O(08) <sup>9</sup>  | 2.701(8) | P(11) | O(89) | 1.598(8) |
| Ba(15) | O(12)               | 2.650(8) | P(12) | O(03) | 1.539(8) |
| Ba(15) | O(20)               | 2.826(8) | P(12) | O(15) | 1.527(8) |
| Ba(15) | O(22)               | 2.668(8) | P(12) | O(19) | 1.531(8) |
| Ba(15) | O(30) <sup>9</sup>  | 2.785(8) | P(12) | O(45) | 1.584(8) |
| Ba(15) | O(64)               | 2.820(8) | P(13) | O(20) | 1.567(8) |
| Ba(15) | O(68)               | 2.674(8) | P(13) | O(46) | 1.505(9) |
| Ba(16) | O(16)               | 2.702(8) | P(13) | O(64) | 1.512(9) |
| Ba(16) | O(40)               | 2.881(8) | P(13) | O(79) | 1.557(8) |
| Ba(16) | O(59) <sup>11</sup> | 2.722(8) | P(14) | O(13) | 1.565(9) |
| Ba(16) | O(65)               | 2.904(8) | P(14) | O(51) | 1.514(9) |
| Ba(16) | O(78)               | 2.804(8) | P(14) | O(62) | 1.552(8) |
| Ba(16) | O(80) <sup>11</sup> | 2.787(8) | P(14) | O(63) | 1.494(9) |
| Ba(16) | O(81)               | 2.749(8) | P(15) | O(11) | 1.585(8) |
| Ba(16) | O(86)               | 2.943(9) | P(15) | O(60) | 1.527(8) |
| Ba(16) | O(87) <sup>6</sup>  | 2.980(8) | P(15) | O(69) | 1.533(8) |
| Ba(17) | O(01) <sup>5</sup>  | 2.968(8) | P(15) | O(90) | 1.516(9) |
| Ba(17) | O(07) <sup>12</sup> | 2.712(8) | P(16) | O(25) | 1.523(8) |
| Ba(17) | O(12) <sup>2</sup>  | 2.865(8) | P(16) | O(48) | 1.578(8) |
| Ba(17) | O(34) <sup>12</sup> | 2.840(8) | P(16) | O(53) | 1.518(8) |
| Ba(17) | O(47) <sup>2</sup>  | 2.964(9) | P(16) | O(54) | 1.537(9) |
| Ba(17) | O(64) <sup>2</sup>  | 2.910(8) | P(17) | O(37) | 1.598(8) |

|        |                     |          |       |                    |          |
|--------|---------------------|----------|-------|--------------------|----------|
| Ba(17) | O(65) <sup>5</sup>  | 2.823(8) | P(17) | O(38)              | 1.512(8) |
| Ba(17) | O(79) <sup>2</sup>  | 2.948(8) | P(17) | O(55)              | 1.522(9) |
| Ba(17) | O(80)               | 2.671(8) | P(17) | O(61)              | 1.525(8) |
| Ba(18) | O(05)               | 2.938(8) | P(18) | O(29)              | 1.537(8) |
| Ba(18) | O(06)               | 2.805(8) | P(18) | O(42)              | 1.507(9) |
| Ba(18) | O(28) <sup>3</sup>  | 2.952(8) | P(18) | O(50)              | 1.527(9) |
| Ba(18) | O(38)               | 2.739(8) | P(18) | O(75)              | 1.608(8) |
| Ba(18) | O(52)               | 2.878(8) | P(19) | O(05)              | 1.519(9) |
| Ba(18) | O(58)               | 2.799(9) | P(19) | O(10)              | 1.526(8) |
| Ba(18) | O(61)               | 2.838(8) | P(19) | O(17)              | 1.580(9) |
| Ba(18) | O(73) <sup>3</sup>  | 2.840(8) | P(19) | O(58)              | 1.529(9) |
| Ba(19) | O(03)               | 2.813(8) | P(20) | O(39)              | 1.515(9) |
| Ba(19) | O(04) <sup>13</sup> | 2.845(8) | P(20) | O(83)              | 1.506(9) |
| Ba(19) | O(14) <sup>13</sup> | 3.001(9) | P(20) | O(92)              | 1.568(9) |
| Ba(19) | O(18)               | 3.008(9) | P(20) | O(95)              | 1.562(9) |
| Ba(19) | O(19)               | 3.075(8) | P(21) | O(59)              | 1.519(8) |
| Ba(19) | O(32)               | 3.039(8) | P(21) | O(71)              | 1.548(8) |
| Ba(19) | O(51)               | 2.697(8) | P(21) | O(80)              | 1.502(9) |
| Ba(19) | O(52)               | 3.029(9) | P(21) | O(84)              | 1.585(9) |
| Ba(19) | O(61)               | 2.812(8) | P(22) | O(32)              | 1.574(9) |
| Ba(20) | O(01) <sup>9</sup>  | 2.861(8) | P(22) | O(49)              | 1.503(8) |
| Ba(20) | O(09) <sup>13</sup> | 2.769(9) | P(22) | O(66)              | 1.554(9) |
| Ba(20) | O(39) <sup>9</sup>  | 3.020(9) | P(22) | O(68)              | 1.519(8) |
| Al(4)  | O(20)               | 1.738(8) | Al(1) | O(13)              | 1.716(9) |
| Al(4)  | O(48)               | 1.722(9) | Al(1) | O(32)              | 1.741(8) |
| Al(4)  | O(62)               | 1.763(9) | Al(1) | O(37)              | 1.731(9) |
| Al(4)  | O(73)               | 1.718(8) | Al(1) | O(89)              | 1.720(9) |
| P(24)  | O(26)               | 1.524(9) | Al(2) | O(66)              | 1.760(9) |
| P(24)  | O(82)               | 1.535(9) | Al(2) | O(75)              | 1.714(9) |
| P(24)  | O(85)               | 1.533(9) | Al(2) | O(84)              | 1.735(8) |
| P(24)  | O(94)               | 1.573(8) | Al(2) | O(94)              | 1.724(9) |
| Al(5)  | O(17)               | 1.714(9) | Al(3) | O(11)              | 1.744(8) |
| Al(5)  | O(35)               | 1.712(8) | Al(3) | O(45)              | 1.738(8) |
| Al(5)  | O(76)               | 1.716(9) | Al(3) | O(71)              | 1.753(8) |
| Al(5)  | O(92)               | 1.746(9) | Al(3) | O(79) <sup>2</sup> | 1.741(8) |
| Al(6)  | O(16)               | 1.738(8) | P(23) | O(23)              | 1.595(9) |
| Al(6)  | O(23)               | 1.733(9) | P(23) | O(24)              | 1.523(9) |
| Al(6)  | O(44)               | 1.735(8) | P(23) | O(81)              | 1.524(8) |
| Al(6)  | O(57)               | 1.755(8) | P(23) | O(86)              | 1.521(9) |
| Al(7)  | O(72)               | 1.739(9) | Al(8) | O(27)              | 1.739(9) |

|       |       |          |       |                    |          |
|-------|-------|----------|-------|--------------------|----------|
| Al(7) | O(88) | 1.715(9) | Al(8) | O(67) <sup>6</sup> | 1.749(8) |
| Al(7) | O(93) | 1.735(8) | Al(8) | O(78)              | 1.714(8) |
| Al(7) | O(95) | 1.770(8) | Al(8) | O(21)              | 1.740(9) |

---

<sup>1</sup>-1+X,+Y,+Z; <sup>2</sup>1+X,1+Y,+Z; <sup>3</sup>+X,1+Y,+Z; <sup>4</sup>-1+X,+Y,-1+Z; <sup>5</sup>1+X,1+Y,1+Z; <sup>6</sup>-1+X,-1+Y,+Z; <sup>7</sup>-1+X,-2+Y,+Z;  
<sup>8</sup>+X,-1+Y,+Z; <sup>9</sup>1+X,+Y,1+Z; <sup>10</sup>+X,+Y,-1+Z; <sup>11</sup>-1+X,-1+Y,-1+Z; <sup>12</sup>2+X,1+Y,1+Z; <sup>13</sup>1+X,+Y,+Z; <sup>14</sup>+X,-1+Y,-  
1+Z; <sup>15</sup>+X,+Y,1+Z

**Table S5.** Crystal data and structure refinement for Ba<sub>3</sub>[Al(PO<sub>4</sub>)<sub>3</sub>].

| Atom               | Atom   | Atom               | Angle/°  | Atom                | Atom   | Atom                | Angle/°  |
|--------------------|--------|--------------------|----------|---------------------|--------|---------------------|----------|
| O(01) <sup>1</sup> | Ba(01) | O(23) <sup>1</sup> | 79.2(2)  | O(25)               | Ba(23) | O(92) <sup>8</sup>  | 122.6(2) |
| O(01) <sup>1</sup> | Ba(01) | O(31) <sup>1</sup> | 119.6(2) | O(54)               | Ba(23) | O(04) <sup>8</sup>  | 163.9(2) |
| O(01) <sup>1</sup> | Ba(01) | O(56)              | 103.6(2) | O(54)               | Ba(23) | O(15) <sup>5</sup>  | 105.7(2) |
| O(01) <sup>1</sup> | Ba(01) | O(57) <sup>1</sup> | 62.1(2)  | O(54)               | Ba(23) | O(19) <sup>5</sup>  | 107.3(2) |
| O(01) <sup>1</sup> | Ba(01) | O(70) <sup>1</sup> | 101.4(2) | O(54)               | Ba(23) | O(25)               | 53.1(2)  |
| O(07)              | Ba(01) | O(01) <sup>1</sup> | 63.5(2)  | O(54)               | Ba(23) | O(76) <sup>8</sup>  | 115.1(2) |
| O(07)              | Ba(01) | O(23) <sup>1</sup> | 110.5(2) | O(54)               | Ba(23) | O(92) <sup>8</sup>  | 81.7(2)  |
| O(07)              | Ba(01) | O(25) <sup>1</sup> | 131.0(2) | O(92) <sup>8</sup>  | Ba(23) | O(76) <sup>8</sup>  | 53.0(2)  |
| O(07)              | Ba(01) | O(31) <sup>1</sup> | 105.2(2) | O(29) <sup>1</sup>  | Ba(24) | O(34) <sup>6</sup>  | 113.8(2) |
| O(07)              | Ba(01) | O(56)              | 51.6(2)  | O(29) <sup>1</sup>  | Ba(24) | O(42) <sup>1</sup>  | 50.7(2)  |
| O(07)              | Ba(01) | O(57) <sup>1</sup> | 125.2(2) | O(30) <sup>6</sup>  | Ba(24) | O(29) <sup>1</sup>  | 151.3(2) |
| O(07)              | Ba(01) | O(70) <sup>1</sup> | 154.2(2) | O(30) <sup>6</sup>  | Ba(24) | O(34) <sup>6</sup>  | 91.3(2)  |
| O(07)              | Ba(01) | O(96) <sup>1</sup> | 68.4(2)  | O(30) <sup>6</sup>  | Ba(24) | O(42) <sup>1</sup>  | 157.6(2) |
| O(23) <sup>1</sup> | Ba(01) | O(31) <sup>1</sup> | 144.3(2) | O(30) <sup>6</sup>  | Ba(24) | O(64) <sup>2</sup>  | 69.2(2)  |
| O(23) <sup>1</sup> | Ba(01) | O(56)              | 88.9(2)  | O(30) <sup>6</sup>  | Ba(24) | O(77) <sup>15</sup> | 99.5(2)  |
| O(23) <sup>1</sup> | Ba(01) | O(57) <sup>1</sup> | 54.0(2)  | O(38)               | Ba(24) | O(29) <sup>1</sup>  | 66.1(2)  |
| O(23) <sup>1</sup> | Ba(01) | O(70) <sup>1</sup> | 85.1(2)  | O(38)               | Ba(24) | O(30) <sup>6</sup>  | 86.0(2)  |
| O(25) <sup>1</sup> | Ba(01) | O(01) <sup>1</sup> | 145.1(2) | O(38)               | Ba(24) | O(34) <sup>6</sup>  | 164.6(2) |
| O(25) <sup>1</sup> | Ba(01) | O(23) <sup>1</sup> | 66.0(2)  | O(38)               | Ba(24) | O(42) <sup>1</sup>  | 113.6(2) |
| O(25) <sup>1</sup> | Ba(01) | O(31) <sup>1</sup> | 89.4(2)  | O(38)               | Ba(24) | O(64) <sup>2</sup>  | 100.7(2) |
| O(25) <sup>1</sup> | Ba(01) | O(56)              | 79.4(2)  | O(38)               | Ba(24) | O(77) <sup>15</sup> | 95.7(2)  |
| O(25) <sup>1</sup> | Ba(01) | O(57) <sup>1</sup> | 93.4(2)  | O(42) <sup>1</sup>  | Ba(24) | O(34) <sup>6</sup>  | 72.7(2)  |
| O(25) <sup>1</sup> | Ba(01) | O(70) <sup>1</sup> | 73.7(2)  | O(64) <sup>2</sup>  | Ba(24) | O(29) <sup>1</sup>  | 108.1(2) |
| O(25) <sup>1</sup> | Ba(01) | O(96) <sup>1</sup> | 141.5(2) | O(64) <sup>2</sup>  | Ba(24) | O(34) <sup>6</sup>  | 64.3(2)  |
| O(31) <sup>1</sup> | Ba(01) | O(56)              | 112.7(2) | O(64) <sup>2</sup>  | Ba(24) | O(42) <sup>1</sup>  | 114.9(2) |
| O(31) <sup>1</sup> | Ba(01) | O(57) <sup>1</sup> | 105.4(2) | O(64) <sup>2</sup>  | Ba(24) | O(77) <sup>15</sup> | 159.2(2) |
| O(31) <sup>1</sup> | Ba(01) | O(70) <sup>1</sup> | 62.5(2)  | O(77) <sup>15</sup> | Ba(24) | O(29) <sup>1</sup>  | 90.2(2)  |
| O(56)              | Ba(01) | O(57) <sup>1</sup> | 141.0(2) | O(77) <sup>15</sup> | Ba(24) | O(34) <sup>6</sup>  | 99.7(2)  |
| O(56)              | Ba(01) | O(70) <sup>1</sup> | 152.7(2) | O(77) <sup>15</sup> | Ba(24) | O(42) <sup>1</sup>  | 68.9(2)  |
| O(70) <sup>1</sup> | Ba(01) | O(57) <sup>1</sup> | 47.7(2)  | O(07) <sup>13</sup> | Ba(25) | O(26) <sup>10</sup> | 139.8(2) |
| O(96) <sup>1</sup> | Ba(01) | O(01) <sup>1</sup> | 70.5(2)  | O(07) <sup>13</sup> | Ba(25) | O(74) <sup>13</sup> | 108.6(2) |
| O(96) <sup>1</sup> | Ba(01) | O(23) <sup>1</sup> | 146.5(3) | O(07) <sup>13</sup> | Ba(25) | O(96)               | 61.0(2)  |
| O(96) <sup>1</sup> | Ba(01) | O(31) <sup>1</sup> | 52.1(2)  | O(09) <sup>10</sup> | Ba(25) | O(07) <sup>13</sup> | 81.9(2)  |
| O(96) <sup>1</sup> | Ba(01) | O(56)              | 111.5(3) | O(09) <sup>10</sup> | Ba(25) | O(26) <sup>10</sup> | 65.9(2)  |
| O(96) <sup>1</sup> | Ba(01) | O(57) <sup>1</sup> | 98.0(3)  | O(09) <sup>10</sup> | Ba(25) | O(27) <sup>13</sup> | 125.3(2) |
| O(96) <sup>1</sup> | Ba(01) | O(70) <sup>1</sup> | 87.2(2)  | O(09) <sup>10</sup> | Ba(25) | O(74) <sup>13</sup> | 167.8(2) |
| O(14) <sup>3</sup> | Ba(02) | O(10) <sup>3</sup> | 104.1(2) | O(09) <sup>10</sup> | Ba(25) | O(85) <sup>10</sup> | 103.9(2) |

|                    |        |                    |          |                     |        |                     |          |
|--------------------|--------|--------------------|----------|---------------------|--------|---------------------|----------|
| O(14) <sup>3</sup> | Ba(02) | O(22) <sup>2</sup> | 109.8(2) | O(09) <sup>10</sup> | Ba(25) | O(96)               | 61.6(2)  |
| O(14) <sup>3</sup> | Ba(02) | O(41) <sup>2</sup> | 75.7(2)  | O(12) <sup>10</sup> | Ba(25) | O(07) <sup>13</sup> | 62.4(2)  |
| O(14) <sup>3</sup> | Ba(02) | O(49) <sup>2</sup> | 76.4(3)  | O(12) <sup>10</sup> | Ba(25) | O(09) <sup>10</sup> | 52.4(2)  |
| O(14) <sup>3</sup> | Ba(02) | O(69)              | 166.5(2) | O(12) <sup>10</sup> | Ba(25) | O(26) <sup>10</sup> | 109.4(2) |
| O(22) <sup>2</sup> | Ba(02) | O(10) <sup>3</sup> | 145.9(2) | O(12) <sup>10</sup> | Ba(25) | O(27) <sup>13</sup> | 80.1(2)  |
| O(41) <sup>2</sup> | Ba(02) | O(10) <sup>3</sup> | 146.6(2) | O(12) <sup>10</sup> | Ba(25) | O(74) <sup>13</sup> | 137.7(2) |
| O(41) <sup>2</sup> | Ba(02) | O(22) <sup>2</sup> | 51.1(2)  | O(12) <sup>10</sup> | Ba(25) | O(85) <sup>10</sup> | 113.2(2) |
| O(41) <sup>2</sup> | Ba(02) | O(49) <sup>2</sup> | 139.6(2) | O(12) <sup>10</sup> | Ba(25) | O(96)               | 94.9(2)  |
| O(41) <sup>2</sup> | Ba(02) | O(69)              | 117.5(2) | O(26) <sup>10</sup> | Ba(25) | O(74) <sup>13</sup> | 101.9(2) |
| O(49) <sup>2</sup> | Ba(02) | O(10) <sup>3</sup> | 69.2(2)  | O(26) <sup>10</sup> | Ba(25) | O(96)               | 82.0(2)  |
| O(49) <sup>2</sup> | Ba(02) | O(22) <sup>2</sup> | 114.7(2) | O(27) <sup>13</sup> | Ba(25) | O(07) <sup>13</sup> | 49.6(2)  |
| O(68) <sup>2</sup> | Ba(02) | O(10) <sup>3</sup> | 110.7(2) | O(27) <sup>13</sup> | Ba(25) | O(26) <sup>10</sup> | 168.8(2) |
| O(68) <sup>2</sup> | Ba(02) | O(14) <sup>3</sup> | 96.2(2)  | O(27) <sup>13</sup> | Ba(25) | O(74) <sup>13</sup> | 66.9(2)  |
| O(68) <sup>2</sup> | Ba(02) | O(22) <sup>2</sup> | 62.1(2)  | O(27) <sup>13</sup> | Ba(25) | O(85) <sup>10</sup> | 120.5(2) |
| O(68) <sup>2</sup> | Ba(02) | O(41) <sup>2</sup> | 102.4(2) | O(27) <sup>13</sup> | Ba(25) | O(96)               | 103.6(2) |
| O(68) <sup>2</sup> | Ba(02) | O(49) <sup>2</sup> | 52.7(2)  | O(85) <sup>10</sup> | Ba(25) | O(07) <sup>13</sup> | 168.7(2) |
| O(68) <sup>2</sup> | Ba(02) | O(69)              | 84.1(2)  | O(85) <sup>10</sup> | Ba(25) | O(26) <sup>10</sup> | 50.8(2)  |
| O(69)              | Ba(02) | O(10) <sup>3</sup> | 63.6(2)  | O(85) <sup>10</sup> | Ba(25) | O(74) <sup>13</sup> | 66.9(2)  |
| O(69)              | Ba(02) | O(22) <sup>2</sup> | 82.3(2)  | O(85) <sup>10</sup> | Ba(25) | O(96)               | 130.3(2) |
| O(69)              | Ba(02) | O(49) <sup>2</sup> | 93.4(2)  | O(91)               | Ba(25) | O(07) <sup>13</sup> | 96.7(2)  |
| O(90)              | Ba(02) | O(10) <sup>3</sup> | 86.0(2)  | O(91)               | Ba(25) | O(09) <sup>10</sup> | 99.8(2)  |
| O(90)              | Ba(02) | O(14) <sup>3</sup> | 134.1(3) | O(91)               | Ba(25) | O(12) <sup>10</sup> | 145.1(2) |
| O(90)              | Ba(02) | O(22) <sup>2</sup> | 73.6(2)  | O(91)               | Ba(25) | O(26) <sup>10</sup> | 67.5(3)  |
| O(90)              | Ba(02) | O(41) <sup>2</sup> | 72.6(2)  | O(91)               | Ba(25) | O(27) <sup>13</sup> | 108.3(2) |
| O(90)              | Ba(02) | O(49) <sup>2</sup> | 145.9(3) | O(91)               | Ba(25) | O(74) <sup>13</sup> | 73.3(2)  |
| O(90)              | Ba(02) | O(68) <sup>2</sup> | 122.3(2) | O(91)               | Ba(25) | O(85) <sup>10</sup> | 91.9(3)  |
| O(90)              | Ba(02) | O(69)              | 53.8(2)  | O(91)               | Ba(25) | O(96)               | 50.4(2)  |
| O(35)              | Ba(03) | O(36)              | 64.7(2)  | O(96)               | Ba(25) | O(74) <sup>13</sup> | 117.4(2) |
| O(35)              | Ba(03) | O(57)              | 47.8(2)  | O(04) <sup>8</sup>  | Ba(26) | O(18) <sup>5</sup>  | 63.0(2)  |
| O(36)              | Ba(03) | O(57)              | 104.6(2) | O(04) <sup>8</sup>  | Ba(26) | O(24)               | 75.3(2)  |
| O(39)              | Ba(03) | O(35)              | 75.5(2)  | O(04) <sup>8</sup>  | Ba(26) | O(26) <sup>11</sup> | 142.7(2) |
| O(39)              | Ba(03) | O(36)              | 110.5(3) | O(04) <sup>8</sup>  | Ba(26) | O(72) <sup>5</sup>  | 98.8(2)  |
| O(39)              | Ba(03) | O(57)              | 83.9(2)  | O(04) <sup>8</sup>  | Ba(26) | O(81)               | 115.4(2) |
| O(43)              | Ba(03) | O(35)              | 111.6(2) | O(04) <sup>8</sup>  | Ba(26) | O(82) <sup>11</sup> | 99.9(2)  |
| O(43)              | Ba(03) | O(36)              | 173.6(3) | O(04) <sup>8</sup>  | Ba(26) | O(91) <sup>5</sup>  | 92.9(2)  |
| O(43)              | Ba(03) | O(39)              | 72.6(2)  | O(18) <sup>5</sup>  | Ba(26) | O(91) <sup>5</sup>  | 114.8(2) |
| O(43)              | Ba(03) | O(57)              | 69.8(2)  | O(24)               | Ba(26) | O(18) <sup>5</sup>  | 91.8(2)  |
| O(43)              | Ba(03) | O(85) <sup>4</sup> | 75.5(2)  | O(24)               | Ba(26) | O(91) <sup>5</sup>  | 142.2(2) |
| O(74)              | Ba(03) | O(35)              | 103.5(3) | O(26) <sup>11</sup> | Ba(26) | O(18) <sup>5</sup>  | 150.8(2) |
| O(74)              | Ba(03) | O(36)              | 83.8(3)  | O(26) <sup>11</sup> | Ba(26) | O(24)               | 107.0(2) |

|                    |        |                    |          |                     |        |                     |          |
|--------------------|--------|--------------------|----------|---------------------|--------|---------------------|----------|
| O(74)              | Ba(03) | O(39)              | 162.6(3) | O(26) <sup>11</sup> | Ba(26) | O(72) <sup>5</sup>  | 84.3(2)  |
| O(74)              | Ba(03) | O(43)              | 92.2(2)  | O(26) <sup>11</sup> | Ba(26) | O(91) <sup>5</sup>  | 62.0(2)  |
| O(74)              | Ba(03) | O(57)              | 82.9(2)  | O(72) <sup>5</sup>  | Ba(26) | O(18) <sup>5</sup>  | 75.8(2)  |
| O(74)              | Ba(03) | O(82) <sup>4</sup> | 116.1(3) | O(72) <sup>5</sup>  | Ba(26) | O(24)               | 167.7(2) |
| O(74)              | Ba(03) | O(85) <sup>4</sup> | 77.1(3)  | O(72) <sup>5</sup>  | Ba(26) | O(91) <sup>5</sup>  | 47.5(2)  |
| O(82) <sup>4</sup> | Ba(03) | O(35)              | 119.3(2) | O(81)               | Ba(26) | O(18) <sup>5</sup>  | 82.4(2)  |
| O(82) <sup>4</sup> | Ba(03) | O(36)              | 75.5(3)  | O(81)               | Ba(26) | O(24)               | 51.9(2)  |
| O(82) <sup>4</sup> | Ba(03) | O(39)              | 78.2(3)  | O(81)               | Ba(26) | O(26) <sup>11</sup> | 91.8(2)  |
| O(82) <sup>4</sup> | Ba(03) | O(43)              | 110.8(2) | O(81)               | Ba(26) | O(72) <sup>5</sup>  | 124.5(2) |
| O(82) <sup>4</sup> | Ba(03) | O(57)              | 160.7(2) | O(81)               | Ba(26) | O(82) <sup>11</sup> | 89.2(2)  |
| O(82) <sup>4</sup> | Ba(03) | O(85) <sup>4</sup> | 55.0(2)  | O(81)               | Ba(26) | O(91) <sup>5</sup>  | 151.6(2) |
| O(85) <sup>4</sup> | Ba(03) | O(35)              | 172.8(2) | O(82) <sup>11</sup> | Ba(26) | O(18) <sup>5</sup>  | 154.4(2) |
| O(85) <sup>4</sup> | Ba(03) | O(36)              | 108.4(3) | O(82) <sup>11</sup> | Ba(26) | O(24)               | 64.3(2)  |
| O(85) <sup>4</sup> | Ba(03) | O(39)              | 106.2(2) | O(82) <sup>11</sup> | Ba(26) | O(26) <sup>11</sup> | 53.1(2)  |
| O(85) <sup>4</sup> | Ba(03) | O(57)              | 139.0(2) | O(82) <sup>11</sup> | Ba(26) | O(72) <sup>5</sup>  | 127.8(2) |
| O(14)              | Ba(04) | O(31) <sup>1</sup> | 110.0(2) | O(82) <sup>11</sup> | Ba(26) | O(91) <sup>5</sup>  | 83.2(2)  |
| O(14)              | Ba(04) | O(36)              | 52.7(2)  | O(08)               | P(01)  | O(78)               | 109.2(4) |
| O(14)              | Ba(04) | O(41) <sup>1</sup> | 75.8(2)  | O(30)               | P(01)  | O(08)               | 110.8(5) |
| O(14)              | Ba(04) | O(62) <sup>1</sup> | 76.0(2)  | O(30)               | P(01)  | O(40)               | 112.4(5) |
| O(14)              | Ba(04) | O(91) <sup>1</sup> | 101.5(2) | O(30)               | P(01)  | O(78)               | 109.7(5) |
| O(31) <sup>1</sup> | Ba(04) | O(36)              | 106.1(2) | O(40)               | P(01)  | O(08)               | 110.2(4) |
| O(31) <sup>1</sup> | Ba(04) | O(41) <sup>1</sup> | 150.7(2) | O(40)               | P(01)  | O(78)               | 104.3(4) |
| O(31) <sup>1</sup> | Ba(04) | O(62) <sup>1</sup> | 87.3(2)  | O(07)               | P(02)  | O(27)               | 103.6(4) |
| O(31) <sup>1</sup> | Ba(04) | O(91) <sup>1</sup> | 50.5(2)  | O(07)               | P(02)  | O(34)               | 112.7(5) |
| O(33)              | Ba(04) | O(14)              | 127.6(3) | O(34)               | P(02)  | O(27)               | 109.0(4) |
| O(33)              | Ba(04) | O(31) <sup>1</sup> | 118.1(3) | O(56)               | P(02)  | O(07)               | 110.0(5) |
| O(33)              | Ba(04) | O(36)              | 93.4(2)  | O(56)               | P(02)  | O(27)               | 110.3(5) |
| O(33)              | Ba(04) | O(41) <sup>1</sup> | 72.5(3)  | O(56)               | P(02)  | O(34)               | 111.1(5) |
| O(33)              | Ba(04) | O(53) <sup>1</sup> | 69.7(2)  | O(04)               | P(03)  | O(14)               | 110.8(5) |
| O(33)              | Ba(04) | O(62) <sup>1</sup> | 123.9(2) | O(04)               | P(03)  | O(76)               | 106.1(5) |
| O(33)              | Ba(04) | O(91) <sup>1</sup> | 93.8(3)  | O(14)               | P(03)  | O(76)               | 106.1(5) |
| O(36)              | Ba(04) | O(62) <sup>1</sup> | 128.7(2) | O(36)               | P(03)  | O(04)               | 112.0(5) |
| O(36)              | Ba(04) | O(91) <sup>1</sup> | 63.6(3)  | O(36)               | P(03)  | O(14)               | 111.7(5) |
| O(41) <sup>1</sup> | Ba(04) | O(36)              | 100.0(2) | O(36)               | P(03)  | O(76)               | 109.8(5) |
| O(41) <sup>1</sup> | Ba(04) | O(62) <sup>1</sup> | 65.8(2)  | O(22)               | P(04)  | O(28)               | 110.7(5) |
| O(41) <sup>1</sup> | Ba(04) | O(91) <sup>1</sup> | 158.5(2) | O(22)               | P(04)  | O(41)               | 111.3(4) |
| O(53) <sup>1</sup> | Ba(04) | O(14)              | 152.1(2) | O(22)               | P(04)  | O(73)               | 110.0(4) |
| O(53) <sup>1</sup> | Ba(04) | O(31) <sup>1</sup> | 69.0(2)  | O(28)               | P(04)  | O(73)               | 103.7(4) |
| O(53) <sup>1</sup> | Ba(04) | O(36)              | 155.1(2) | O(41)               | P(04)  | O(28)               | 112.0(4) |
| O(53) <sup>1</sup> | Ba(04) | O(41) <sup>1</sup> | 92.4(2)  | O(41)               | P(04)  | O(73)               | 108.8(4) |

|                    |        |                    |            |       |       |       |          |
|--------------------|--------|--------------------|------------|-------|-------|-------|----------|
| O(53) <sup>1</sup> | Ba(04) | O(62) <sup>1</sup> | 76.1(2)    | O(31) | P(05) | O(72) | 105.9(4) |
| O(53) <sup>1</sup> | Ba(04) | O(91) <sup>1</sup> | 98.4(3)    | O(91) | P(05) | O(31) | 109.3(5) |
| O(91) <sup>1</sup> | Ba(04) | O(62) <sup>1</sup> | 134.9(2)   | O(91) | P(05) | O(72) | 106.5(5) |
| O(08) <sup>6</sup> | Ba(05) | O(40) <sup>6</sup> | 52.6(2)    | O(91) | P(05) | O(96) | 114.4(5) |
| O(08) <sup>6</sup> | Ba(05) | O(43) <sup>6</sup> | 108.1(2)   | O(96) | P(05) | O(31) | 111.9(5) |
| O(08) <sup>6</sup> | Ba(05) | O(50) <sup>2</sup> | 164.4(2)   | O(96) | P(05) | O(72) | 108.3(5) |
| O(08) <sup>6</sup> | Ba(05) | O(75) <sup>2</sup> | 117.1(2)   | O(01) | P(06) | O(16) | 111.4(4) |
| O(08) <sup>6</sup> | Ba(05) | O(85) <sup>2</sup> | 67.1(2)    | O(01) | P(06) | O(43) | 110.5(4) |
| O(40) <sup>6</sup> | Ba(05) | O(50) <sup>2</sup> | 142.3(2)   | O(01) | P(06) | O(65) | 111.5(4) |
| O(40) <sup>6</sup> | Ba(05) | O(85) <sup>2</sup> | 114.3(2)   | O(43) | P(06) | O(16) | 108.5(4) |
| O(43) <sup>6</sup> | Ba(05) | O(40) <sup>6</sup> | 107.1(2)   | O(65) | P(06) | O(16) | 103.5(4) |
| O(43) <sup>6</sup> | Ba(05) | O(50) <sup>2</sup> | 66.6(2)    | O(65) | P(06) | O(43) | 111.3(5) |
| O(43) <sup>6</sup> | Ba(05) | O(75) <sup>2</sup> | 91.0(2)    | O(21) | P(07) | O(44) | 104.1(5) |
| O(43) <sup>6</sup> | Ba(05) | O(85) <sup>2</sup> | 67.1(2)    | O(33) | P(07) | O(21) | 106.4(5) |
| O(50) <sup>2</sup> | Ba(05) | O(85) <sup>2</sup> | 97.7(2)    | O(33) | P(07) | O(44) | 106.3(5) |
| O(65) <sup>6</sup> | Ba(05) | O(08) <sup>6</sup> | 106.1(2)   | O(74) | P(07) | O(21) | 110.8(5) |
| O(65) <sup>6</sup> | Ba(05) | O(40) <sup>6</sup> | 65.8(2)    | O(74) | P(07) | O(33) | 115.6(5) |
| O(65) <sup>6</sup> | Ba(05) | O(43) <sup>6</sup> | 54.6(2)    | O(74) | P(07) | O(44) | 112.7(5) |
| O(65) <sup>6</sup> | Ba(05) | O(50) <sup>2</sup> | 83.0(2)    | O(77) | P(08) | O(67) | 109.3(5) |
| O(65) <sup>6</sup> | Ba(05) | O(75) <sup>2</sup> | 131.9(2)   | O(77) | P(08) | O(87) | 113.5(5) |
| O(65) <sup>6</sup> | Ba(05) | O(85) <sup>2</sup> | 115.8(2)   | O(77) | P(08) | O(93) | 105.6(5) |
| O(69)              | Ba(05) | O(08) <sup>6</sup> | 112.3(2)   | O(87) | P(08) | O(67) | 110.0(5) |
| O(69)              | Ba(05) | O(40) <sup>6</sup> | 86.2(2)    | O(87) | P(08) | O(93) | 112.1(5) |
| O(69)              | Ba(05) | O(43) <sup>6</sup> | 136.8(2)   | O(93) | P(08) | O(67) | 106.0(5) |
| O(69)              | Ba(05) | O(50) <sup>2</sup> | 77.9(2)    | O(06) | P(09) | O(88) | 104.5(5) |
| O(69)              | Ba(05) | O(65) <sup>6</sup> | 98.9(2)    | O(18) | P(09) | O(06) | 113.4(5) |
| O(69)              | Ba(05) | O(75) <sup>2</sup> | 84.1(2)    | O(18) | P(09) | O(52) | 110.8(5) |
| O(69)              | Ba(05) | O(85) <sup>2</sup> | 144.5(2)   | O(18) | P(09) | O(88) | 109.1(5) |
| O(75) <sup>2</sup> | Ba(05) | O(40) <sup>6</sup> | 161.0(2)   | O(52) | P(09) | O(06) | 108.4(5) |
| O(75) <sup>2</sup> | Ba(05) | O(50) <sup>2</sup> | 50.4(2)    | O(52) | P(09) | O(88) | 110.4(5) |
| O(75) <sup>2</sup> | Ba(05) | O(85) <sup>2</sup> | 67.2(2)    | O(02) | P(10) | O(35) | 110.7(5) |
| O(02)              | Ba(06) | O(03) <sup>5</sup> | 111.6(2)   | O(02) | P(10) | O(57) | 111.2(5) |
| O(02)              | Ba(06) | O(06) <sup>5</sup> | 150.3(2)   | O(02) | P(10) | O(70) | 112.3(5) |
| O(02)              | Ba(06) | O(15) <sup>5</sup> | 73.3(2)    | O(57) | P(10) | O(35) | 101.4(5) |
| O(02)              | Ba(06) | O(18) <sup>5</sup> | 130.0(2)   | O(70) | P(10) | O(35) | 112.8(5) |
| O(02)              | Ba(06) | O(28) <sup>1</sup> | 130.4(2)   | O(70) | P(10) | O(57) | 107.9(5) |
| O(02)              | Ba(06) | O(33)              | 89.6(2)    | O(09) | P(11) | O(89) | 105.0(5) |
| O(02)              | Ba(06) | O(41) <sup>1</sup> | 90.5(2)    | O(12) | P(11) | O(09) | 110.3(5) |
| O(02)              | Ba(06) | O(44)              | 64.5(2)    | O(12) | P(11) | O(47) | 112.4(5) |
| O(03) <sup>5</sup> | Ba(06) | O(33)              | 157.92(19) | O(12) | P(11) | O(89) | 104.7(5) |

|                    |        |                    |          |       |       |       |          |
|--------------------|--------|--------------------|----------|-------|-------|-------|----------|
| O(06) <sup>5</sup> | Ba(06) | O(03) <sup>5</sup> | 97.9(2)  | O(47) | P(11) | O(09) | 112.7(5) |
| O(06) <sup>5</sup> | Ba(06) | O(15) <sup>5</sup> | 127.1(2) | O(47) | P(11) | O(89) | 111.2(5) |
| O(06) <sup>5</sup> | Ba(06) | O(18) <sup>5</sup> | 53.3(2)  | O(03) | P(12) | O(45) | 110.7(4) |
| O(06) <sup>5</sup> | Ba(06) | O(33)              | 61.6(2)  | O(15) | P(12) | O(03) | 110.5(4) |
| O(06) <sup>5</sup> | Ba(06) | O(41) <sup>1</sup> | 83.4(2)  | O(15) | P(12) | O(19) | 111.0(4) |
| O(06) <sup>5</sup> | Ba(06) | O(44)              | 88.4(2)  | O(15) | P(12) | O(45) | 104.1(4) |
| O(15) <sup>5</sup> | Ba(06) | O(03) <sup>5</sup> | 51.0(2)  | O(19) | P(12) | O(03) | 112.0(4) |
| O(15) <sup>5</sup> | Ba(06) | O(18) <sup>5</sup> | 75.8(2)  | O(19) | P(12) | O(45) | 108.2(4) |
| O(15) <sup>5</sup> | Ba(06) | O(33)              | 147.5(2) | O(46) | P(13) | O(20) | 111.6(5) |
| O(15) <sup>5</sup> | Ba(06) | O(41) <sup>1</sup> | 141.3(2) | O(46) | P(13) | O(64) | 114.6(5) |
| O(15) <sup>5</sup> | Ba(06) | O(44)              | 101.6(2) | O(46) | P(13) | O(79) | 112.1(5) |
| O(18) <sup>5</sup> | Ba(06) | O(03) <sup>5</sup> | 75.2(2)  | O(64) | P(13) | O(20) | 107.1(4) |
| O(18) <sup>5</sup> | Ba(06) | O(33)              | 96.3(2)  | O(64) | P(13) | O(79) | 106.1(5) |
| O(18) <sup>5</sup> | Ba(06) | O(44)              | 84.9(2)  | O(79) | P(13) | O(20) | 104.7(4) |
| O(28) <sup>1</sup> | Ba(06) | O(03) <sup>5</sup> | 60.8(2)  | O(51) | P(14) | O(13) | 111.5(5) |
| O(28) <sup>1</sup> | Ba(06) | O(06) <sup>5</sup> | 67.3(2)  | O(51) | P(14) | O(62) | 109.2(5) |
| O(28) <sup>1</sup> | Ba(06) | O(15) <sup>5</sup> | 111.1(2) | O(62) | P(14) | O(13) | 105.6(5) |
| O(28) <sup>1</sup> | Ba(06) | O(18) <sup>5</sup> | 97.1(2)  | O(63) | P(14) | O(13) | 109.8(5) |
| O(28) <sup>1</sup> | Ba(06) | O(33)              | 101.1(2) | O(63) | P(14) | O(51) | 111.3(5) |
| O(28) <sup>1</sup> | Ba(06) | O(41) <sup>1</sup> | 54.3(2)  | O(63) | P(14) | O(62) | 109.3(5) |
| O(28) <sup>1</sup> | Ba(06) | O(44)              | 146.7(2) | O(60) | P(15) | O(11) | 105.4(5) |
| O(41) <sup>1</sup> | Ba(06) | O(03) <sup>5</sup> | 108.3(2) | O(60) | P(15) | O(69) | 111.0(5) |
| O(41) <sup>1</sup> | Ba(06) | O(18) <sup>5</sup> | 136.2(2) | O(69) | P(15) | O(11) | 107.9(4) |
| O(41) <sup>1</sup> | Ba(06) | O(33)              | 63.7(2)  | O(90) | P(15) | O(11) | 108.7(5) |
| O(41) <sup>1</sup> | Ba(06) | O(44)              | 102.5(2) | O(90) | P(15) | O(60) | 111.2(5) |
| O(44)              | Ba(06) | O(03) <sup>5</sup> | 149.1(2) | O(90) | P(15) | O(69) | 112.2(5) |
| O(44)              | Ba(06) | O(33)              | 45.9(2)  | O(25) | P(16) | O(48) | 105.1(4) |
| O(10) <sup>8</sup> | Ba(07) | O(29) <sup>5</sup> | 71.7(2)  | O(25) | P(16) | O(54) | 110.5(5) |
| O(10) <sup>8</sup> | Ba(07) | O(84) <sup>5</sup> | 124.5(2) | O(53) | P(16) | O(25) | 112.1(5) |
| O(19) <sup>5</sup> | Ba(07) | O(10) <sup>8</sup> | 108.4(2) | O(53) | P(16) | O(48) | 110.8(5) |
| O(19) <sup>5</sup> | Ba(07) | O(29) <sup>5</sup> | 179.7(2) | O(53) | P(16) | O(54) | 110.3(5) |
| O(19) <sup>5</sup> | Ba(07) | O(58) <sup>8</sup> | 80.8(2)  | O(54) | P(16) | O(48) | 107.7(5) |
| O(19) <sup>5</sup> | Ba(07) | O(84) <sup>5</sup> | 110.3(2) | O(38) | P(17) | O(37) | 109.0(5) |
| O(29) <sup>5</sup> | Ba(07) | O(84) <sup>5</sup> | 69.8(2)  | O(38) | P(17) | O(55) | 110.4(5) |
| O(46)              | Ba(07) | O(10) <sup>8</sup> | 124.5(3) | O(38) | P(17) | O(61) | 110.1(5) |
| O(46)              | Ba(07) | O(19) <sup>5</sup> | 97.9(3)  | O(55) | P(17) | O(37) | 107.3(5) |
| O(46)              | Ba(07) | O(29) <sup>5</sup> | 81.8(3)  | O(55) | P(17) | O(61) | 111.4(5) |
| O(46)              | Ba(07) | O(49) <sup>5</sup> | 158.2(3) | O(61) | P(17) | O(37) | 108.5(5) |
| O(46)              | Ba(07) | O(58) <sup>8</sup> | 84.9(3)  | O(29) | P(18) | O(75) | 107.0(5) |
| O(46)              | Ba(07) | O(84) <sup>5</sup> | 87.4(3)  | O(42) | P(18) | O(29) | 111.0(5) |



|                    |        |                    |          |       |       |       |          |
|--------------------|--------|--------------------|----------|-------|-------|-------|----------|
| O(49) <sup>5</sup> | Ba(07) | O(10) <sup>8</sup> | 76.8(2)  | O(42) | P(18) | O(50) | 114.0(5) |
| O(49) <sup>5</sup> | Ba(07) | O(19) <sup>5</sup> | 76.7(2)  | O(42) | P(18) | O(75) | 110.5(5) |
| O(49) <sup>5</sup> | Ba(07) | O(29) <sup>5</sup> | 103.5(3) | O(50) | P(18) | O(29) | 110.6(5) |
| O(49) <sup>5</sup> | Ba(07) | O(58) <sup>8</sup> | 114.5(2) | O(50) | P(18) | O(75) | 103.2(4) |
| O(49) <sup>5</sup> | Ba(07) | O(84) <sup>5</sup> | 75.1(2)  | O(05) | P(19) | O(10) | 112.9(5) |
| O(58) <sup>8</sup> | Ba(07) | O(10) <sup>8</sup> | 54.0(2)  | O(05) | P(19) | O(17) | 103.7(5) |
| O(58) <sup>8</sup> | Ba(07) | O(29) <sup>5</sup> | 99.1(2)  | O(05) | P(19) | O(58) | 111.6(5) |
| O(58) <sup>8</sup> | Ba(07) | O(84) <sup>5</sup> | 167.3(2) | O(10) | P(19) | O(17) | 109.7(5) |
| O(03) <sup>8</sup> | Ba(08) | O(11) <sup>8</sup> | 79.8(2)  | O(10) | P(19) | O(58) | 110.8(5) |
| O(03) <sup>8</sup> | Ba(08) | O(22)              | 106.3(2) | O(58) | P(19) | O(17) | 107.8(5) |
| O(03) <sup>8</sup> | Ba(08) | O(30) <sup>9</sup> | 163.6(2) | O(39) | P(20) | O(92) | 110.4(5) |
| O(03) <sup>8</sup> | Ba(08) | O(40) <sup>9</sup> | 146.8(2) | O(39) | P(20) | O(95) | 110.5(5) |
| O(03) <sup>8</sup> | Ba(08) | O(61) <sup>8</sup> | 67.3(2)  | O(83) | P(20) | O(39) | 112.8(5) |
| O(03) <sup>8</sup> | Ba(08) | O(71) <sup>8</sup> | 64.4(2)  | O(83) | P(20) | O(92) | 106.7(5) |
| O(11) <sup>8</sup> | Ba(08) | O(22)              | 88.1(2)  | O(83) | P(20) | O(95) | 109.2(5) |
| O(11) <sup>8</sup> | Ba(08) | O(30) <sup>9</sup> | 112.3(2) | O(95) | P(20) | O(92) | 107.0(5) |
| O(11) <sup>8</sup> | Ba(08) | O(61) <sup>8</sup> | 146.4(2) | O(59) | P(21) | O(71) | 108.4(5) |
| O(11) <sup>8</sup> | Ba(08) | O(71) <sup>8</sup> | 54.5(2)  | O(59) | P(21) | O(84) | 111.0(4) |
| O(22)              | Ba(08) | O(30) <sup>9</sup> | 64.7(2)  | O(71) | P(21) | O(84) | 103.1(4) |
| O(28)              | Ba(08) | O(03) <sup>8</sup> | 65.1(2)  | O(80) | P(21) | O(59) | 112.2(5) |
| O(28)              | Ba(08) | O(11) <sup>8</sup> | 106.1(2) | O(80) | P(21) | O(71) | 111.1(5) |
| O(28)              | Ba(08) | O(22)              | 49.6(2)  | O(80) | P(21) | O(84) | 110.6(5) |
| O(28)              | Ba(08) | O(30) <sup>9</sup> | 100.1(2) | O(49) | P(22) | O(32) | 107.1(5) |
| O(28)              | Ba(08) | O(40) <sup>9</sup> | 130.7(2) | O(49) | P(22) | O(66) | 112.7(5) |
| O(28)              | Ba(08) | O(55) <sup>8</sup> | 110.2(2) | O(49) | P(22) | O(68) | 112.2(5) |
| O(28)              | Ba(08) | O(61) <sup>8</sup> | 66.7(2)  | O(66) | P(22) | O(32) | 104.3(5) |
| O(28)              | Ba(08) | O(71) <sup>8</sup> | 128.2(2) | O(68) | P(22) | O(32) | 110.3(5) |
| O(40) <sup>9</sup> | Ba(08) | O(11) <sup>8</sup> | 67.9(2)  | O(68) | P(22) | O(66) | 109.8(5) |
| O(40) <sup>9</sup> | Ba(08) | O(22)              | 81.1(2)  | O(13) | Al(1) | O(32) | 116.4(4) |
| O(40) <sup>9</sup> | Ba(08) | O(30) <sup>9</sup> | 48.3(2)  | O(13) | Al(1) | O(37) | 110.0(5) |
| O(40) <sup>9</sup> | Ba(08) | O(61) <sup>8</sup> | 142.7(2) | O(13) | Al(1) | O(89) | 105.4(4) |
| O(40) <sup>9</sup> | Ba(08) | O(71) <sup>8</sup> | 89.6(2)  | O(37) | Al(1) | O(32) | 112.3(4) |
| O(55) <sup>8</sup> | Ba(08) | O(03) <sup>8</sup> | 111.0(3) | O(89) | Al(1) | O(32) | 105.2(4) |
| O(55) <sup>8</sup> | Ba(08) | O(11) <sup>8</sup> | 143.4(2) | O(89) | Al(1) | O(37) | 106.7(4) |
| O(55) <sup>8</sup> | Ba(08) | O(22)              | 119.5(2) | O(75) | Al(2) | O(66) | 110.0(4) |
| O(55) <sup>8</sup> | Ba(08) | O(30) <sup>9</sup> | 66.2(2)  | O(75) | Al(2) | O(84) | 105.3(4) |
| O(55) <sup>8</sup> | Ba(08) | O(40) <sup>9</sup> | 91.6(2)  | O(75) | Al(2) | O(94) | 114.8(5) |
| O(55) <sup>8</sup> | Ba(08) | O(61) <sup>8</sup> | 52.3(2)  | O(84) | Al(2) | O(66) | 110.2(4) |
| O(55) <sup>8</sup> | Ba(08) | O(71) <sup>8</sup> | 97.4(2)  | O(94) | Al(2) | O(66) | 108.3(5) |
| O(61) <sup>8</sup> | Ba(08) | O(22)              | 107.1(2) | O(94) | Al(2) | O(84) | 108.2(4) |

|                    |        |                    |          |                    |       |                    |          |
|--------------------|--------|--------------------|----------|--------------------|-------|--------------------|----------|
| O(61) <sup>8</sup> | Ba(08) | O(30) <sup>9</sup> | 101.3(2) | O(11)              | Al(3) | O(71)              | 101.6(4) |
| O(61) <sup>8</sup> | Ba(08) | O(71) <sup>8</sup> | 102.6(2) | O(45)              | Al(3) | O(11)              | 111.4(4) |
| O(71) <sup>8</sup> | Ba(08) | O(22)              | 142.0(2) | O(45)              | Al(3) | O(71)              | 100.4(4) |
| O(71) <sup>8</sup> | Ba(08) | O(30) <sup>9</sup> | 131.3(2) | O(45)              | Al(3) | O(79) <sup>3</sup> | 111.3(4) |
| O(05) <sup>3</sup> | Ba(11) | O(29) <sup>2</sup> | 89.0(2)  | O(79) <sup>3</sup> | Al(3) | O(11)              | 119.2(4) |
| O(05) <sup>3</sup> | Ba(11) | O(47) <sup>3</sup> | 141.3(2) | O(79) <sup>3</sup> | Al(3) | O(71)              | 110.8(4) |
| O(05) <sup>3</sup> | Ba(11) | O(69)              | 113.3(2) | O(24)              | P(23) | O(23)              | 108.7(5) |
| O(10) <sup>3</sup> | Ba(11) | O(05) <sup>3</sup> | 53.4(2)  | O(24)              | P(23) | O(81)              | 111.1(5) |
| O(10) <sup>3</sup> | Ba(11) | O(29) <sup>2</sup> | 70.3(2)  | O(81)              | P(23) | O(23)              | 105.8(5) |
| O(10) <sup>3</sup> | Ba(11) | O(47) <sup>3</sup> | 165.3(2) | O(86)              | P(23) | O(23)              | 108.2(5) |
| O(10) <sup>3</sup> | Ba(11) | O(69)              | 65.1(2)  | O(86)              | P(23) | O(24)              | 112.2(5) |
| O(29) <sup>2</sup> | Ba(11) | O(47) <sup>3</sup> | 107.1(2) | O(86)              | P(23) | O(81)              | 110.6(5) |
| O(29) <sup>2</sup> | Ba(11) | O(69)              | 93.1(2)  | O(20)              | Al(4) | O(62)              | 108.1(4) |
| O(37) <sup>3</sup> | Ba(11) | O(05) <sup>3</sup> | 69.0(2)  | O(48)              | Al(4) | O(20)              | 110.8(4) |
| O(37) <sup>3</sup> | Ba(11) | O(10) <sup>3</sup> | 116.9(2) | O(48)              | Al(4) | O(62)              | 112.5(4) |
| O(37) <sup>3</sup> | Ba(11) | O(29) <sup>2</sup> | 86.8(2)  | O(73)              | Al(4) | O(20)              | 109.6(4) |
| O(37) <sup>3</sup> | Ba(11) | O(47) <sup>3</sup> | 76.9(2)  | O(73)              | Al(4) | O(48)              | 110.3(4) |
| O(37) <sup>3</sup> | Ba(11) | O(69)              | 177.8(2) | O(73)              | Al(4) | O(62)              | 105.3(4) |
| O(47) <sup>3</sup> | Ba(11) | O(69)              | 101.1(2) | O(26)              | P(24) | O(82)              | 111.5(5) |
| O(50) <sup>2</sup> | Ba(11) | O(05) <sup>3</sup> | 141.5(2) | O(26)              | P(24) | O(85)              | 110.8(5) |
| O(50) <sup>2</sup> | Ba(11) | O(10) <sup>3</sup> | 107.6(2) | O(26)              | P(24) | O(94)              | 107.2(5) |
| O(50) <sup>2</sup> | Ba(11) | O(29) <sup>2</sup> | 52.6(2)  | O(82)              | P(24) | O(94)              | 105.3(5) |
| O(50) <sup>2</sup> | Ba(11) | O(37) <sup>3</sup> | 101.7(2) | O(85)              | P(24) | O(82)              | 111.4(5) |
| O(50) <sup>2</sup> | Ba(11) | O(47) <sup>3</sup> | 62.3(2)  | O(85)              | P(24) | O(94)              | 110.5(5) |
| O(50) <sup>2</sup> | Ba(11) | O(69)              | 76.5(2)  | O(17)              | Al(5) | O(76)              | 108.1(4) |
| O(60)              | Ba(11) | O(05) <sup>3</sup> | 95.7(2)  | O(17)              | Al(5) | O(92)              | 113.3(5) |
| O(60)              | Ba(11) | O(10) <sup>3</sup> | 84.2(3)  | O(35)              | Al(5) | O(17)              | 107.8(4) |
| O(60)              | Ba(11) | O(29) <sup>2</sup> | 144.0(2) | O(35)              | Al(5) | O(76)              | 115.6(4) |
| O(60)              | Ba(11) | O(37) <sup>3</sup> | 128.1(2) | O(35)              | Al(5) | O(92)              | 106.1(4) |
| O(60)              | Ba(11) | O(47) <sup>3</sup> | 91.2(3)  | O(76)              | Al(5) | O(92)              | 106.1(5) |
| O(60)              | Ba(11) | O(50) <sup>2</sup> | 116.9(2) | O(16)              | Al(6) | O(57)              | 99.5(4)  |
| O(60)              | Ba(11) | O(69)              | 52.4(2)  | O(23)              | Al(6) | O(16)              | 110.9(4) |
| O(06) <sup>5</sup> | Ba(12) | O(21)              | 89.9(2)  | O(23)              | Al(6) | O(44)              | 119.6(4) |
| O(06) <sup>5</sup> | Ba(12) | O(33)              | 70.1(3)  | O(23)              | Al(6) | O(57)              | 103.3(4) |
| O(06) <sup>5</sup> | Ba(12) | O(53) <sup>1</sup> | 95.0(2)  | O(44)              | Al(6) | O(16)              | 112.9(4) |
| O(06) <sup>5</sup> | Ba(12) | O(54) <sup>1</sup> | 82.4(2)  | O(44)              | Al(6) | O(57)              | 108.1(4) |
| O(06) <sup>5</sup> | Ba(12) | O(83) <sup>5</sup> | 115.6(3) | O(72)              | Al(7) | O(95)              | 108.4(4) |
| O(06) <sup>5</sup> | Ba(12) | O(88) <sup>5</sup> | 52.7(2)  | O(88)              | Al(7) | O(72)              | 102.3(4) |
| O(21)              | Ba(12) | O(88) <sup>5</sup> | 73.4(2)  | O(88)              | Al(7) | O(93)              | 112.9(4) |
| O(33)              | Ba(12) | O(21)              | 52.1(2)  | O(88)              | Al(7) | O(95)              | 110.4(4) |

|                    |        |                    |          |                     |        |                     |          |
|--------------------|--------|--------------------|----------|---------------------|--------|---------------------|----------|
| O(33)              | Ba(12) | O(88) <sup>5</sup> | 98.6(3)  | O(93)               | Al(7)  | O(72)               | 114.6(4) |
| O(53) <sup>1</sup> | Ba(12) | O(21)              | 113.0(2) | O(93)               | Al(7)  | O(95)               | 108.0(4) |
| O(53) <sup>1</sup> | Ba(12) | O(33)              | 67.4(2)  | O(21)               | Al(8)  | O(67) <sup>5</sup>  | 108.0(4) |
| O(53) <sup>1</sup> | Ba(12) | O(88) <sup>5</sup> | 147.7(3) | O(27)               | Al(8)  | O(21)               | 106.1(4) |
| O(54) <sup>1</sup> | Ba(12) | O(21)              | 164.7(2) | O(27)               | Al(8)  | O(67) <sup>5</sup>  | 104.8(4) |
| O(54) <sup>1</sup> | Ba(12) | O(33)              | 112.7(2) | O(78)               | Al(8)  | O(21)               | 111.7(4) |
| O(54) <sup>1</sup> | Ba(12) | O(53) <sup>1</sup> | 55.0(2)  | O(78)               | Al(8)  | O(27)               | 112.8(4) |
| O(54) <sup>1</sup> | Ba(12) | O(83) <sup>5</sup> | 84.4(3)  | O(78)               | Al(8)  | O(67) <sup>5</sup>  | 112.9(4) |
| O(54) <sup>1</sup> | Ba(12) | O(88) <sup>5</sup> | 111.3(2) | O(14) <sup>13</sup> | Ba(19) | O(32)               | 86.3(2)  |
| O(56)              | Ba(12) | O(06) <sup>5</sup> | 175.9(2) | O(14) <sup>13</sup> | Ba(19) | O(52)               | 113.4(2) |
| O(56)              | Ba(12) | O(21)              | 92.4(2)  | O(18)               | Ba(19) | O(19)               | 91.3(2)  |
| O(56)              | Ba(12) | O(33)              | 108.7(3) | O(18)               | Ba(19) | O(32)               | 164.8(2) |
| O(56)              | Ba(12) | O(53) <sup>1</sup> | 80.9(3)  | O(18)               | Ba(19) | O(52)               | 48.9(2)  |
| O(56)              | Ba(12) | O(54) <sup>1</sup> | 94.6(3)  | O(32)               | Ba(19) | O(19)               | 97.1(2)  |
| O(56)              | Ba(12) | O(83) <sup>5</sup> | 66.7(3)  | O(51)               | Ba(19) | O(03)               | 155.7(2) |
| O(56)              | Ba(12) | O(88) <sup>5</sup> | 131.2(3) | O(51)               | Ba(19) | O(04) <sup>13</sup> | 101.2(2) |
| O(83) <sup>5</sup> | Ba(12) | O(21)              | 110.8(2) | O(51)               | Ba(19) | O(14) <sup>13</sup> | 65.7(2)  |
| O(83) <sup>5</sup> | Ba(12) | O(33)              | 162.9(2) | O(51)               | Ba(19) | O(18)               | 107.0(2) |
| O(83) <sup>5</sup> | Ba(12) | O(53) <sup>1</sup> | 125.7(3) | O(51)               | Ba(19) | O(19)               | 149.8(2) |
| O(83) <sup>5</sup> | Ba(12) | O(88) <sup>5</sup> | 75.2(3)  | O(51)               | Ba(19) | O(32)               | 71.2(2)  |
| O(05)              | Ba(13) | O(72)              | 143.5(2) | O(51)               | Ba(19) | O(52)               | 67.6(2)  |
| O(05)              | Ba(13) | O(95)              | 113.4(2) | O(51)               | Ba(19) | O(61)               | 87.0(2)  |
| O(17)              | Ba(13) | O(05)              | 51.1(2)  | O(52)               | Ba(19) | O(19)               | 138.5(2) |
| O(17)              | Ba(13) | O(72)              | 134.5(2) | O(52)               | Ba(19) | O(32)               | 119.3(2) |
| O(17)              | Ba(13) | O(95)              | 78.7(2)  | O(61)               | Ba(19) | O(03)               | 68.9(2)  |
| O(31)              | Ba(13) | O(05)              | 158.7(2) | O(61)               | Ba(19) | O(04) <sup>13</sup> | 161.3(2) |
| O(31)              | Ba(13) | O(17)              | 139.0(2) | O(61)               | Ba(19) | O(14) <sup>13</sup> | 146.0(2) |
| O(31)              | Ba(13) | O(51)              | 81.5(3)  | O(61)               | Ba(19) | O(18)               | 100.0(2) |
| O(31)              | Ba(13) | O(72)              | 49.7(2)  | O(61)               | Ba(19) | O(19)               | 113.9(2) |
| O(31)              | Ba(13) | O(95)              | 87.9(2)  | O(61)               | Ba(19) | O(32)               | 65.1(2)  |
| O(51)              | Ba(13) | O(05)              | 80.9(2)  | O(61)               | Ba(19) | O(52)               | 70.1(2)  |
| O(51)              | Ba(13) | O(17)              | 129.1(3) | O(01) <sup>9</sup>  | Ba(20) | O(39) <sup>9</sup>  | 95.8(2)  |
| O(51)              | Ba(13) | O(72)              | 93.3(2)  | O(01) <sup>9</sup>  | Ba(20) | O(43) <sup>9</sup>  | 50.9(2)  |
| O(51)              | Ba(13) | O(95)              | 145.3(2) | O(01) <sup>9</sup>  | Ba(20) | O(47) <sup>13</sup> | 78.5(2)  |
| O(52)              | Ba(13) | O(05)              | 74.3(2)  | O(01) <sup>9</sup>  | Ba(20) | O(77) <sup>9</sup>  | 163.4(2) |
| O(52)              | Ba(13) | O(17)              | 104.0(3) | O(01) <sup>9</sup>  | Ba(20) | O(93) <sup>9</sup>  | 132.7(2) |
| O(52)              | Ba(13) | O(31)              | 111.8(2) | O(01) <sup>9</sup>  | Ba(20) | O(96) <sup>9</sup>  | 66.6(2)  |
| O(52)              | Ba(13) | O(51)              | 73.1(3)  | O(09) <sup>13</sup> | Ba(20) | O(01) <sup>9</sup>  | 95.2(2)  |
| O(52)              | Ba(13) | O(70)              | 159.5(3) | O(09) <sup>13</sup> | Ba(20) | O(39) <sup>9</sup>  | 150.8(2) |
| O(52)              | Ba(13) | O(72)              | 69.6(2)  | O(09) <sup>13</sup> | Ba(20) | O(43) <sup>9</sup>  | 139.2(2) |

|                     |        |                     |          |                     |        |                     |          |
|---------------------|--------|---------------------|----------|---------------------|--------|---------------------|----------|
| O(52)               | Ba(13) | O(95)               | 80.5(3)  | O(09) <sup>13</sup> | Ba(20) | O(47) <sup>13</sup> | 50.6(2)  |
| O(63)               | Ba(13) | O(05)               | 76.3(2)  | O(09) <sup>13</sup> | Ba(20) | O(77) <sup>9</sup>  | 68.3(2)  |
| O(63)               | Ba(13) | O(17)               | 93.1(3)  | O(09) <sup>13</sup> | Ba(20) | O(93) <sup>9</sup>  | 79.9(2)  |
| O(63)               | Ba(13) | O(31)               | 83.7(2)  | O(09) <sup>13</sup> | Ba(20) | O(96) <sup>9</sup>  | 64.6(2)  |
| O(63)               | Ba(13) | O(51)               | 55.1(2)  | O(39) <sup>9</sup>  | Ba(20) | O(47) <sup>13</sup> | 158.6(2) |
| O(63)               | Ba(13) | O(52)               | 123.3(3) | O(39) <sup>9</sup>  | Ba(20) | O(96) <sup>9</sup>  | 95.5(2)  |
| O(63)               | Ba(13) | O(70)               | 77.0(3)  | O(43) <sup>9</sup>  | Ba(20) | O(39) <sup>9</sup>  | 65.9(2)  |
| O(63)               | Ba(13) | O(72)               | 128.9(2) | O(43) <sup>9</sup>  | Ba(20) | O(47) <sup>13</sup> | 95.4(2)  |
| O(63)               | Ba(13) | O(95)               | 156.2(2) | O(43) <sup>9</sup>  | Ba(20) | O(96) <sup>9</sup>  | 109.8(2) |
| O(70)               | Ba(13) | O(05)               | 111.9(2) | O(50)               | Ba(20) | O(01) <sup>9</sup>  | 99.4(2)  |
| O(70)               | Ba(13) | O(17)               | 69.5(3)  | O(50)               | Ba(20) | O(09) <sup>13</sup> | 103.8(2) |
| O(70)               | Ba(13) | O(31)               | 70.0(2)  | O(50)               | Ba(20) | O(39) <sup>9</sup>  | 101.0(2) |
| O(70)               | Ba(13) | O(51)               | 126.5(3) | O(50)               | Ba(20) | O(43) <sup>9</sup>  | 67.0(2)  |
| O(70)               | Ba(13) | O(72)               | 100.6(2) | O(50)               | Ba(20) | O(47) <sup>13</sup> | 60.3(2)  |
| O(70)               | Ba(13) | O(95)               | 79.2(2)  | O(50)               | Ba(20) | O(77) <sup>9</sup>  | 83.0(2)  |
| O(95)               | Ba(13) | O(72)               | 55.9(2)  | O(50)               | Ba(20) | O(93) <sup>9</sup>  | 127.6(2) |
| O(09) <sup>10</sup> | Ba(14) | O(26) <sup>10</sup> | 69.8(2)  | O(50)               | Ba(20) | O(96) <sup>9</sup>  | 159.4(2) |
| O(09) <sup>10</sup> | Ba(14) | O(66) <sup>10</sup> | 102.8(2) | O(77) <sup>9</sup>  | Ba(20) | O(39) <sup>9</sup>  | 99.9(2)  |
| O(09) <sup>10</sup> | Ba(14) | O(77)               | 70.0(2)  | O(77) <sup>9</sup>  | Ba(20) | O(43) <sup>9</sup>  | 142.2(2) |
| O(09) <sup>10</sup> | Ba(14) | O(89) <sup>10</sup> | 52.1(2)  | O(77) <sup>9</sup>  | Ba(20) | O(47) <sup>13</sup> | 88.6(2)  |
| O(26) <sup>10</sup> | Ba(14) | O(66) <sup>10</sup> | 85.5(2)  | O(77) <sup>9</sup>  | Ba(20) | O(96) <sup>9</sup>  | 106.2(2) |
| O(26) <sup>10</sup> | Ba(14) | O(77)               | 106.2(2) | O(93) <sup>9</sup>  | Ba(20) | O(39) <sup>9</sup>  | 72.7(2)  |
| O(26) <sup>10</sup> | Ba(14) | O(89) <sup>10</sup> | 101.8(2) | O(93) <sup>9</sup>  | Ba(20) | O(43) <sup>9</sup>  | 138.3(2) |
| O(55) <sup>10</sup> | Ba(14) | O(09) <sup>10</sup> | 120.7(3) | O(93) <sup>9</sup>  | Ba(20) | O(47) <sup>13</sup> | 126.1(2) |
| O(55) <sup>10</sup> | Ba(14) | O(26) <sup>10</sup> | 165.2(3) | O(93) <sup>9</sup>  | Ba(20) | O(77) <sup>9</sup>  | 49.2(2)  |
| O(55) <sup>10</sup> | Ba(14) | O(66) <sup>10</sup> | 101.1(3) | O(93) <sup>9</sup>  | Ba(20) | O(96) <sup>9</sup>  | 69.1(2)  |
| O(55) <sup>10</sup> | Ba(14) | O(77)               | 70.9(2)  | O(96) <sup>9</sup>  | Ba(20) | O(47) <sup>13</sup> | 100.9(2) |
| O(55) <sup>10</sup> | Ba(14) | O(89) <sup>10</sup> | 93.0(2)  | O(24)               | Ba(21) | O(39) <sup>8</sup>  | 97.0(2)  |
| O(59) <sup>10</sup> | Ba(14) | O(09) <sup>10</sup> | 168.4(3) | O(24)               | Ba(21) | O(56) <sup>13</sup> | 79.6(2)  |
| O(59) <sup>10</sup> | Ba(14) | O(26) <sup>10</sup> | 101.4(3) | O(24)               | Ba(21) | O(82) <sup>11</sup> | 60.9(2)  |
| O(59) <sup>10</sup> | Ba(14) | O(55) <sup>10</sup> | 69.5(3)  | O(42) <sup>11</sup> | Ba(21) | O(24)               | 157.0(2) |
| O(59) <sup>10</sup> | Ba(14) | O(66) <sup>10</sup> | 68.2(2)  | O(42) <sup>11</sup> | Ba(21) | O(34) <sup>13</sup> | 81.9(2)  |
| O(59) <sup>10</sup> | Ba(14) | O(77)               | 120.8(2) | O(42) <sup>11</sup> | Ba(21) | O(39) <sup>8</sup>  | 74.8(3)  |
| O(59) <sup>10</sup> | Ba(14) | O(89) <sup>10</sup> | 125.4(2) | O(42) <sup>11</sup> | Ba(21) | O(56) <sup>13</sup> | 123.4(2) |
| O(77)               | Ba(14) | O(66) <sup>10</sup> | 162.2(2) | O(42) <sup>11</sup> | Ba(21) | O(82) <sup>11</sup> | 96.3(2)  |
| O(77)               | Ba(14) | O(89) <sup>10</sup> | 98.6(2)  | O(42) <sup>11</sup> | Ba(21) | O(83) <sup>8</sup>  | 105.1(3) |
| O(87)               | Ba(14) | O(09) <sup>10</sup> | 98.0(2)  | O(56) <sup>13</sup> | Ba(21) | O(39) <sup>8</sup>  | 110.9(2) |
| O(87)               | Ba(14) | O(26) <sup>10</sup> | 73.5(3)  | O(56) <sup>13</sup> | Ba(21) | O(82) <sup>11</sup> | 139.4(2) |
| O(87)               | Ba(14) | O(55) <sup>10</sup> | 93.9(3)  | O(82) <sup>11</sup> | Ba(21) | O(39) <sup>8</sup>  | 68.1(2)  |
| O(87)               | Ba(14) | O(59) <sup>10</sup> | 86.4(2)  | O(83) <sup>8</sup>  | Ba(21) | O(24)               | 84.5(2)  |

|                     |        |                     |          |                    |        |                     |          |
|---------------------|--------|---------------------|----------|--------------------|--------|---------------------|----------|
| O(87)               | Ba(14) | O(66) <sup>10</sup> | 143.1(2) | O(83) <sup>8</sup> | Ba(21) | O(34) <sup>13</sup> | 96.6(2)  |
| O(87)               | Ba(14) | O(77)               | 54.7(2)  | O(83) <sup>8</sup> | Ba(21) | O(39) <sup>8</sup>  | 50.5(2)  |
| O(87)               | Ba(14) | O(89) <sup>10</sup> | 147.8(2) | O(83) <sup>8</sup> | Ba(21) | O(56) <sup>13</sup> | 60.5(2)  |
| O(89) <sup>10</sup> | Ba(14) | O(66) <sup>10</sup> | 65.3(2)  | O(83) <sup>8</sup> | Ba(21) | O(82) <sup>11</sup> | 103.9(2) |
| O(08) <sup>9</sup>  | Ba(15) | O(20)               | 156.9(2) | O(86)              | Ba(21) | O(24)               | 53.0(2)  |
| O(08) <sup>9</sup>  | Ba(15) | O(30) <sup>9</sup>  | 54.3(2)  | O(86)              | Ba(21) | O(34) <sup>13</sup> | 76.6(2)  |
| O(08) <sup>9</sup>  | Ba(15) | O(64)               | 106.8(2) | O(86)              | Ba(21) | O(39) <sup>8</sup>  | 149.4(2) |
| O(08) <sup>9</sup>  | Ba(15) | O(89)               | 99.8(2)  | O(86)              | Ba(21) | O(42) <sup>11</sup> | 129.9(3) |
| O(12)               | Ba(15) | O(08) <sup>9</sup>  | 80.3(3)  | O(86)              | Ba(21) | O(56) <sup>13</sup> | 73.0(3)  |
| O(12)               | Ba(15) | O(20)               | 97.6(2)  | O(86)              | Ba(21) | O(82) <sup>11</sup> | 89.1(2)  |
| O(12)               | Ba(15) | O(22)               | 176.6(3) | O(86)              | Ba(21) | O(83) <sup>8</sup>  | 121.9(3) |
| O(12)               | Ba(15) | O(30) <sup>9</sup>  | 100.5(2) | O(02)              | Ba(22) | O(15) <sup>5</sup>  | 72.5(2)  |
| O(12)               | Ba(15) | O(64)               | 69.3(2)  | O(02)              | Ba(22) | O(25)               | 91.9(2)  |
| O(12)               | Ba(15) | O(68)               | 110.3(2) | O(02)              | Ba(22) | O(45) <sup>5</sup>  | 113.6(2) |
| O(12)               | Ba(15) | O(89)               | 49.5(2)  | O(02)              | Ba(22) | O(48)               | 143.2(2) |
| O(22)               | Ba(15) | O(08) <sup>9</sup>  | 96.9(2)  | O(02)              | Ba(22) | O(60) <sup>5</sup>  | 111.5(2) |
| O(22)               | Ba(15) | O(20)               | 85.7(2)  | O(02)              | Ba(22) | O(70)               | 54.3(2)  |
| O(22)               | Ba(15) | O(30) <sup>9</sup>  | 79.4(2)  | O(02)              | Ba(22) | O(90) <sup>5</sup>  | 66.3(2)  |
| O(22)               | Ba(15) | O(64)               | 113.6(2) | O(15) <sup>5</sup> | Ba(22) | O(25)               | 64.7(2)  |
| O(22)               | Ba(15) | O(68)               | 67.4(2)  | O(15) <sup>5</sup> | Ba(22) | O(48)               | 89.7(2)  |
| O(22)               | Ba(15) | O(89)               | 129.6(2) | O(15) <sup>5</sup> | Ba(22) | O(90) <sup>5</sup>  | 82.9(2)  |
| O(30) <sup>9</sup>  | Ba(15) | O(20)               | 104.2(2) | O(25)              | Ba(22) | O(90) <sup>5</sup>  | 145.6(2) |
| O(30) <sup>9</sup>  | Ba(15) | O(64)               | 68.0(2)  | O(45) <sup>5</sup> | Ba(22) | O(15) <sup>5</sup>  | 52.6(2)  |
| O(30) <sup>9</sup>  | Ba(15) | O(89)               | 146.2(2) | O(45) <sup>5</sup> | Ba(22) | O(25)               | 95.0(2)  |
| O(64)               | Ba(15) | O(20)               | 52.0(2)  | O(45) <sup>5</sup> | Ba(22) | O(48)               | 75.9(2)  |
| O(64)               | Ba(15) | O(89)               | 106.3(2) | O(45) <sup>5</sup> | Ba(22) | O(60) <sup>5</sup>  | 72.9(2)  |
| O(68)               | Ba(15) | O(08) <sup>9</sup>  | 86.5(2)  | O(45) <sup>5</sup> | Ba(22) | O(70)               | 164.4(2) |
| O(68)               | Ba(15) | O(20)               | 115.4(2) | O(45) <sup>5</sup> | Ba(22) | O(90) <sup>5</sup>  | 72.3(2)  |
| O(68)               | Ba(15) | O(30) <sup>9</sup>  | 124.7(2) | O(48)              | Ba(22) | O(25)               | 51.4(2)  |
| O(68)               | Ba(15) | O(64)               | 166.1(2) | O(48)              | Ba(22) | O(90) <sup>5</sup>  | 144.7(2) |
| O(68)               | Ba(15) | O(89)               | 66.6(2)  | O(60) <sup>5</sup> | Ba(22) | O(15) <sup>5</sup>  | 117.8(2) |
| O(16)               | Ba(16) | O(40)               | 94.4(2)  | O(60) <sup>5</sup> | Ba(22) | O(25)               | 156.4(2) |
| O(16)               | Ba(16) | O(59) <sup>11</sup> | 159.8(2) | O(60) <sup>5</sup> | Ba(22) | O(48)               | 105.3(2) |
| O(16)               | Ba(16) | O(65)               | 51.6(2)  | O(60) <sup>5</sup> | Ba(22) | O(70)               | 119.1(3) |
| O(16)               | Ba(16) | O(78)               | 83.2(2)  | O(60) <sup>5</sup> | Ba(22) | O(90) <sup>5</sup>  | 50.8(2)  |
| O(16)               | Ba(16) | O(80) <sup>11</sup> | 106.7(2) | O(63)              | Ba(22) | O(02)               | 123.8(2) |
| O(16)               | Ba(16) | O(81)               | 73.7(2)  | O(63)              | Ba(22) | O(15) <sup>5</sup>  | 159.5(2) |
| O(16)               | Ba(16) | O(86)               | 70.2(2)  | O(63)              | Ba(22) | O(25)               | 99.9(2)  |
| O(16)               | Ba(16) | O(87) <sup>5</sup>  | 120.7(2) | O(63)              | Ba(22) | O(45) <sup>5</sup>  | 119.7(2) |
| O(40)               | Ba(16) | O(65)               | 63.9(2)  | O(63)              | Ba(22) | O(48)               | 69.8(2)  |

|                     |        |                     |          |                    |        |                    |          |
|---------------------|--------|---------------------|----------|--------------------|--------|--------------------|----------|
| O(40)               | Ba(16) | O(86)               | 144.8(2) | O(63)              | Ba(22) | O(60) <sup>5</sup> | 70.6(2)  |
| O(40)               | Ba(16) | O(87) <sup>5</sup>  | 101.4(2) | O(63)              | Ba(22) | O(70)              | 75.2(2)  |
| O(59) <sup>11</sup> | Ba(16) | O(40)               | 80.4(2)  | O(63)              | Ba(22) | O(90) <sup>5</sup> | 114.2(2) |
| O(59) <sup>11</sup> | Ba(16) | O(65)               | 109.5(2) | O(70)              | Ba(22) | O(15) <sup>5</sup> | 111.9(2) |
| O(59) <sup>11</sup> | Ba(16) | O(78)               | 107.6(3) | O(70)              | Ba(22) | O(25)              | 77.0(2)  |
| O(59) <sup>11</sup> | Ba(16) | O(80) <sup>11</sup> | 54.1(2)  | O(70)              | Ba(22) | O(48)              | 107.9(2) |
| O(59) <sup>11</sup> | Ba(16) | O(81)               | 118.0(3) | O(70)              | Ba(22) | O(90) <sup>5</sup> | 106.8(2) |
| O(59) <sup>11</sup> | Ba(16) | O(86)               | 103.0(3) | O(04) <sup>8</sup> | Ba(23) | O(76) <sup>8</sup> | 48.8(2)  |
| O(59) <sup>11</sup> | Ba(16) | O(87) <sup>5</sup>  | 79.5(2)  | O(04) <sup>8</sup> | Ba(23) | O(92) <sup>8</sup> | 86.9(2)  |
| O(65)               | Ba(16) | O(86)               | 82.5(2)  | O(15) <sup>5</sup> | Ba(23) | O(04) <sup>8</sup> | 85.5(2)  |
| O(65)               | Ba(16) | O(87) <sup>5</sup>  | 159.9(2) | O(15) <sup>5</sup> | Ba(23) | O(25)              | 64.5(2)  |
| O(78)               | Ba(16) | O(40)               | 50.9(2)  | O(15) <sup>5</sup> | Ba(23) | O(76) <sup>8</sup> | 120.8(2) |
| O(78)               | Ba(16) | O(65)               | 94.4(2)  | O(15) <sup>5</sup> | Ba(23) | O(92) <sup>8</sup> | 172.4(2) |
| O(78)               | Ba(16) | O(86)               | 148.5(2) | O(19) <sup>5</sup> | Ba(23) | O(04) <sup>8</sup> | 69.6(2)  |
| O(78)               | Ba(16) | O(87) <sup>5</sup>  | 65.5(2)  | O(19) <sup>5</sup> | Ba(23) | O(15) <sup>5</sup> | 54.0(2)  |
| O(80) <sup>11</sup> | Ba(16) | O(40)               | 89.7(2)  | O(19) <sup>5</sup> | Ba(23) | O(25)              | 105.1(2) |
| O(80) <sup>11</sup> | Ba(16) | O(65)               | 66.5(2)  | O(19) <sup>5</sup> | Ba(23) | O(76) <sup>8</sup> | 73.5(2)  |
| O(80) <sup>11</sup> | Ba(16) | O(78)               | 140.4(2) | O(19) <sup>5</sup> | Ba(23) | O(92) <sup>8</sup> | 122.7(2) |
| O(80) <sup>11</sup> | Ba(16) | O(86)               | 66.4(2)  | O(24)              | Ba(23) | O(04) <sup>8</sup> | 77.8(2)  |
| O(80) <sup>11</sup> | Ba(16) | O(87) <sup>5</sup>  | 129.8(2) | O(24)              | Ba(23) | O(15) <sup>5</sup> | 96.7(2)  |
| O(81)               | Ba(16) | O(40)               | 155.0(2) | O(24)              | Ba(23) | O(19) <sup>5</sup> | 136.7(2) |
| O(81)               | Ba(16) | O(65)               | 118.9(2) | O(24)              | Ba(23) | O(25)              | 84.2(2)  |
| O(81)               | Ba(16) | O(78)               | 105.0(2) | O(24)              | Ba(23) | O(54)              | 111.5(3) |
| O(81)               | Ba(16) | O(80) <sup>11</sup> | 114.6(2) | O(24)              | Ba(23) | O(76) <sup>8</sup> | 105.5(2) |
| O(81)               | Ba(16) | O(86)               | 52.1(2)  | O(24)              | Ba(23) | O(92) <sup>8</sup> | 81.9(2)  |
| O(81)               | Ba(16) | O(87) <sup>5</sup>  | 68.4(2)  | O(25)              | Ba(23) | O(04) <sup>8</sup> | 142.9(2) |
| O(86)               | Ba(16) | O(87) <sup>5</sup>  | 113.7(2) | O(25)              | Ba(23) | O(76) <sup>8</sup> | 167.6(2) |
| O(07) <sup>12</sup> | Ba(17) | O(01) <sup>6</sup>  | 61.4(2)  | O(06)              | Ba(18) | O(52)              | 51.5(2)  |
| O(07) <sup>12</sup> | Ba(17) | O(12) <sup>3</sup>  | 64.1(2)  | O(06)              | Ba(18) | O(54) <sup>2</sup> | 70.7(2)  |
| O(07) <sup>12</sup> | Ba(17) | O(34) <sup>12</sup> | 54.7(2)  | O(06)              | Ba(18) | O(61)              | 97.3(2)  |
| O(07) <sup>12</sup> | Ba(17) | O(47) <sup>3</sup>  | 96.0(2)  | O(06)              | Ba(18) | O(73) <sup>2</sup> | 78.2(2)  |
| O(07) <sup>12</sup> | Ba(17) | O(64) <sup>3</sup>  | 101.3(2) | O(28) <sup>2</sup> | Ba(18) | O(54) <sup>2</sup> | 109.3(2) |
| O(07) <sup>12</sup> | Ba(17) | O(65) <sup>6</sup>  | 112.3(2) | O(38)              | Ba(18) | O(05)              | 69.6(2)  |
| O(07) <sup>12</sup> | Ba(17) | O(79) <sup>3</sup>  | 150.3(2) | O(38)              | Ba(18) | O(06)              | 147.5(2) |
| O(12) <sup>3</sup>  | Ba(17) | O(01) <sup>6</sup>  | 98.2(2)  | O(38)              | Ba(18) | O(28) <sup>2</sup> | 89.3(2)  |
| O(12) <sup>3</sup>  | Ba(17) | O(47) <sup>3</sup>  | 51.5(2)  | O(38)              | Ba(18) | O(52)              | 117.7(2) |
| O(12) <sup>3</sup>  | Ba(17) | O(64) <sup>3</sup>  | 65.2(2)  | O(38)              | Ba(18) | O(54) <sup>2</sup> | 139.1(2) |
| O(12) <sup>3</sup>  | Ba(17) | O(79) <sup>3</sup>  | 93.8(2)  | O(38)              | Ba(18) | O(58)              | 91.4(2)  |
| O(34) <sup>12</sup> | Ba(17) | O(01) <sup>6</sup>  | 105.2(2) | O(38)              | Ba(18) | O(61)              | 53.0(2)  |
| O(34) <sup>12</sup> | Ba(17) | O(12) <sup>3</sup>  | 86.3(2)  | O(38)              | Ba(18) | O(73) <sup>2</sup> | 98.1(2)  |

|                     |        |                     |          |                     |        |                     |          |
|---------------------|--------|---------------------|----------|---------------------|--------|---------------------|----------|
| O(34) <sup>12</sup> | Ba(17) | O(47) <sup>3</sup>  | 137.4(2) | O(52)               | Ba(18) | O(05)               | 70.2(2)  |
| O(34) <sup>12</sup> | Ba(17) | O(64) <sup>3</sup>  | 66.1(2)  | O(52)               | Ba(18) | O(28) <sup>2</sup>  | 92.1(2)  |
| O(34) <sup>12</sup> | Ba(17) | O(79) <sup>3</sup>  | 107.2(2) | O(52)               | Ba(18) | O(54) <sup>2</sup>  | 98.3(2)  |
| O(47) <sup>3</sup>  | Ba(17) | O(01) <sup>6</sup>  | 79.7(2)  | O(58)               | Ba(18) | O(05)               | 52.1(2)  |
| O(64) <sup>3</sup>  | Ba(17) | O(01) <sup>6</sup>  | 161.0(2) | O(58)               | Ba(18) | O(06)               | 119.3(2) |
| O(64) <sup>3</sup>  | Ba(17) | O(47) <sup>3</sup>  | 95.3(2)  | O(58)               | Ba(18) | O(28) <sup>2</sup>  | 166.6(2) |
| O(64) <sup>3</sup>  | Ba(17) | O(79) <sup>3</sup>  | 49.5(2)  | O(58)               | Ba(18) | O(52)               | 99.3(2)  |
| O(65) <sup>6</sup>  | Ba(17) | O(01) <sup>6</sup>  | 51.6(2)  | O(58)               | Ba(18) | O(54) <sup>2</sup>  | 62.4(2)  |
| O(65) <sup>6</sup>  | Ba(17) | O(12) <sup>3</sup>  | 130.5(2) | O(58)               | Ba(18) | O(61)               | 125.4(2) |
| O(65) <sup>6</sup>  | Ba(17) | O(34) <sup>12</sup> | 134.5(2) | O(58)               | Ba(18) | O(73) <sup>2</sup>  | 116.6(2) |
| O(65) <sup>6</sup>  | Ba(17) | O(47) <sup>3</sup>  | 82.2(2)  | O(61)               | Ba(18) | O(05)               | 75.3(2)  |
| O(65) <sup>6</sup>  | Ba(17) | O(64) <sup>3</sup>  | 146.4(2) | O(61)               | Ba(18) | O(28) <sup>2</sup>  | 64.8(2)  |
| O(65) <sup>6</sup>  | Ba(17) | O(79) <sup>3</sup>  | 97.1(2)  | O(61)               | Ba(18) | O(52)               | 72.0(2)  |
| O(79) <sup>3</sup>  | Ba(17) | O(01) <sup>6</sup>  | 146.0(2) | O(61)               | Ba(18) | O(54) <sup>2</sup>  | 167.8(2) |
| O(79) <sup>3</sup>  | Ba(17) | O(47) <sup>3</sup>  | 83.3(2)  | O(61)               | Ba(18) | O(73) <sup>2</sup>  | 109.1(2) |
| O(80)               | Ba(17) | O(01) <sup>6</sup>  | 106.9(2) | O(73) <sup>2</sup>  | Ba(18) | O(05)               | 161.3(2) |
| O(80)               | Ba(17) | O(07) <sup>12</sup> | 128.2(2) | O(73) <sup>2</sup>  | Ba(18) | O(28) <sup>2</sup>  | 50.1(2)  |
| O(80)               | Ba(17) | O(12) <sup>3</sup>  | 154.9(2) | O(73) <sup>2</sup>  | Ba(18) | O(52)               | 128.4(2) |
| O(80)               | Ba(17) | O(34) <sup>12</sup> | 86.5(2)  | O(73) <sup>2</sup>  | Ba(18) | O(54) <sup>2</sup>  | 70.8(2)  |
| O(80)               | Ba(17) | O(47) <sup>3</sup>  | 133.4(3) | O(03)               | Ba(19) | O(04) <sup>13</sup> | 101.4(2) |
| O(80)               | Ba(17) | O(64) <sup>3</sup>  | 89.9(2)  | O(03)               | Ba(19) | O(14) <sup>13</sup> | 137.3(2) |
| O(80)               | Ba(17) | O(65) <sup>6</sup>  | 69.1(2)  | O(03)               | Ba(19) | O(18)               | 76.6(2)  |
| O(80)               | Ba(17) | O(79) <sup>3</sup>  | 65.6(2)  | O(03)               | Ba(19) | O(19)               | 51.0(2)  |
| O(05)               | Ba(18) | O(28) <sup>2</sup>  | 139.8(2) | O(03)               | Ba(19) | O(32)               | 99.0(2)  |
| O(05)               | Ba(18) | O(54) <sup>2</sup>  | 108.8(2) | O(03)               | Ba(19) | O(52)               | 100.8(2) |
| O(06)               | Ba(18) | O(05)               | 119.9(2) | O(04) <sup>13</sup> | Ba(19) | O(14) <sup>13</sup> | 51.2(2)  |
| O(06)               | Ba(18) | O(28) <sup>2</sup>  | 63.3(2)  | O(04) <sup>13</sup> | Ba(19) | O(18)               | 61.7(2)  |
| O(04) <sup>13</sup> | Ba(19) | O(52)               | 97.3(2)  | O(04) <sup>13</sup> | Ba(19) | O(19)               | 66.1(2)  |
| O(14) <sup>13</sup> | Ba(19) | O(18)               | 106.9(2) | O(04) <sup>13</sup> | Ba(19) | O(32)               | 133.4(2) |
| O(14) <sup>13</sup> | Ba(19) | O(19)               | 86.3(2)  |                     |        |                     |          |

<sup>1</sup>-1+X,+Y,+Z; <sup>2</sup>+X,1+Y,+Z; <sup>3</sup>1+X,1+Y,+Z; <sup>4</sup>-1+X,+Y,-1+Z; <sup>5</sup>-1+X,-1+Y,+Z; <sup>6</sup>1+X,1+Y,1+Z; <sup>7</sup>-1+X,-2+Y,+Z;  
<sup>8</sup>+X,-1+Y,+Z; <sup>9</sup>1+X,+Y,1+Z; <sup>10</sup>+X,+Y,-1+Z; <sup>11</sup>-1+X,-1+Y,-1+Z; <sup>12</sup>2+X,1+Y,1+Z; <sup>13</sup>1+X,+Y,+Z; <sup>14</sup>+X,-1+Y,-  
1+Z; <sup>15</sup>+X,+Y,1+Z; <sup>16</sup>+X,1+Y,1+Z; <sup>17</sup>-2+X,-1+Y,-1+Z

## References

- [1] a) G. Sheldrick, *Acta Crystallogr., Sect. A: Found. Adv.* 2015, **71**, 3-8; b) G. Sheldrick, *Acta Crystallogr, Sect. C: Struct. Chem.* 2015, **71**, 3-8.
- [2] A. Spek, *J. Appl. Crystallogr.* 2003, **36**, 7-13.
- [3] a) M. D. Segall, P. J. D. Lindan, M. J. Probert, C. J. Pickard, P. J. Hasnip, S. J. Clark, M. C. Payne, *J. Phys.: Condens. Matter.* 2002, **14**, 2717-2744; b) V. Milman, B. Winkler, J. A. White, C. J. Pickard, M. C. Payne, E. V. Akhmatkaya, R. H. Nobes, *Int. J. Quantum Chem.* 2000, **77**, 895-910.
- [4] J. P. Perdew, K. Burke, M. Ernzerhof, *Phys. Rev. Lett.* 1996, **77**, 3865-3868.
- [5] J. S. Lin, A. Qteish, M. C. Payne, V. Heine, *Phys. Rev. B* 1993, **47**, 4174-4180.
- [6] B. Zhang, M.-H. Lee, Z. Yang, Q. Jing, S. Pan, M. Zhang, H. Wu, X. Su, C.-S. Li, *Appl. Phys. Lett.* 2015, **106**, 031906.
- [7] J. Lin, M.-H. Lee, Z.-P. Liu, C. Chen, C. J. Pickard, *Phys. Rev. B* 1999, **60**, 13380-13389.
